# Supplementary material for: Changes in Head and Pelvic Movement Symmetry after Diagnostic Anaesthesia: Interactions between Subjective Judgement Categories and Commonly Applied Blocks
Source: MDPI journal article supplement (doi:10.3390/ani13243769), 2023-12-06
Supplement: s1 [file s1]

## Supplementary data

**Table S1:** Pairwise comparisons for two-way interaction model between forelimb diagnostic anaesthesia 'efficacy' and 'type' for outcome variable DHDmin, i.e. head movement asymmetry associated with changes in weight-bearing between contralateral forelimbs.

Given are mean differences (in mm), standard error (in mm), degrees of freedom, significance achieved, upper and lower bounds of 95% confidence intervals for the pairwise difference (in mm). Pairwise significant differences at  $P < 0.05$  after Bonferroni correction are indicated with '\*'.

Forelimb block types: ASNB: abaxial sesamoid nerve block; Low4: Low4-point nerve block; PD: palmar digital nerve block; other: all other nerve/joint blocks.

Efficacy: neg: negative block (0 to 30% perceived change); part pos: partially positive block (>30 to 70% perceived change; pos: positive block (>70% change).

### Pairwise Comparisons<sup>a</sup>

| (I) Type x Efficacy | (J) Type x Efficacy | Mean Difference (I-J) | Std. Error | df      | Sig. <sup>c</sup> | 95% Confidence Interval for Difference <sup>c</sup> |             |
|---------------------|---------------------|-----------------------|------------|---------|-------------------|-----------------------------------------------------|-------------|
|                     |                     |                       |            |         |                   | Lower Bound                                         | Upper Bound |
| ASNB_neg            | ASNB_part pos       | 8.650                 | 4.824      | 252.490 | 1.000             | -7.797                                              | 25.097      |
|                     | ASNB_pos            | 9.857                 | 4.970      | 252.999 | 1.000             | -7.087                                              | 26.800      |
|                     | Low4_neg            | 3.151                 | 4.300      | 205.714 | 1.000             | -11.550                                             | 17.851      |
|                     | Low4_part pos       | 13.263                | 5.254      | 226.078 | .810              | -4.676                                              | 31.203      |
|                     | Low4_pos            | 25.656*               | 4.692      | 249.994 | <0.001            | 9.656                                               | 41.656      |
|                     | other_neg           | .713                  | 3.225      | 218.400 | 1.000             | -10.305                                             | 11.731      |
|                     | other_part pos      | 3.707                 | 3.580      | 244.411 | 1.000             | -8.504                                              | 15.918      |
|                     | other_pos           | 4.626                 | 4.288      | 252.528 | 1.000             | -9.994                                              | 19.246      |
|                     | PD_neg              | -5.969                | 3.629      | 212.034 | 1.000             | -18.372                                             | 6.435       |
|                     | PD_part pos         | 5.382                 | 4.343      | 250.253 | 1.000             | -9.427                                              | 20.192      |
|                     | PD_pos              | 10.349                | 3.686      | 248.901 | .355              | -2.220                                              | 22.917      |
| ASNB_part pos       | ASNB_neg            | -8.650                | 4.824      | 252.490 | 1.000             | -25.097                                             | 7.797       |
|                     | ASNB_pos            | 1.207                 | 5.596      | 251.722 | 1.000             | -17.873                                             | 20.286      |
|                     | Low4_neg            | -5.499                | 5.091      | 247.817 | 1.000             | -22.861                                             | 11.863      |
|                     | Low4_part pos       | 4.614                 | 5.874      | 247.844 | 1.000             | -15.418                                             | 24.645      |
|                     | Low4_pos            | 17.007                | 5.313      | 249.444 | .102              | -1.111                                              | 35.124      |
|                     | other_neg           | -7.937                | 4.213      | 252.249 | 1.000             | -22.301                                             | 6.427       |
|                     | other_part pos      | -4.943                | 4.446      | 251.780 | 1.000             | -20.101                                             | 10.215      |

|               |                |         |       |         |       |         |        |
|---------------|----------------|---------|-------|---------|-------|---------|--------|
|               | other_pos      | -4.024  | 4.973 | 251.727 | 1.000 | -20.978 | 12.931 |
|               | PD_neg         | -14.618 | 4.472 | 246.252 | .081  | -29.871 | .634   |
|               | PD_part pos    | -3.267  | 5.077 | 252.016 | 1.000 | -20.577 | 14.042 |
|               | PD_pos         | 1.699   | 4.475 | 247.800 | 1.000 | -13.563 | 16.961 |
| ASNB_pos      | ASNB_neg       | -9.857  | 4.970 | 252.999 | 1.000 | -26.800 | 7.087  |
|               | ASNB_part pos  | -1.207  | 5.596 | 251.722 | 1.000 | -20.286 | 17.873 |
|               | Low4_neg       | -6.706  | 5.212 | 249.710 | 1.000 | -24.477 | 11.065 |
|               | Low4_part pos  | 3.407   | 6.042 | 251.731 | 1.000 | -17.195 | 24.008 |
|               | Low4_pos       | 15.800  | 5.403 | 250.319 | .249  | -2.624  | 34.224 |
|               | other_neg      | -9.143  | 4.432 | 244.745 | 1.000 | -24.259 | 5.972  |
|               | other_part pos | -6.150  | 4.575 | 252.576 | 1.000 | -21.747 | 9.448  |
|               | other_pos      | -5.231  | 5.140 | 248.565 | 1.000 | -22.759 | 12.297 |
|               | PD_neg         | -15.825 | 4.661 | 252.795 | .052  | -31.715 | .064   |
|               | PD_part pos    | -4.474  | 5.128 | 249.458 | 1.000 | -21.961 | 13.013 |
|               | PD_pos         | .492    | 4.578 | 252.837 | 1.000 | -15.115 | 16.099 |
|               |                |         |       |         |       |         |        |
| Low4_neg      | ASNB_neg       | -3.151  | 4.300 | 205.714 | 1.000 | -17.851 | 11.550 |
|               | ASNB_part pos  | 5.499   | 5.091 | 247.817 | 1.000 | -11.863 | 22.861 |
|               | ASNB_pos       | 6.706   | 5.212 | 249.710 | 1.000 | -11.065 | 24.477 |
|               | Low4_part pos  | 10.113  | 5.589 | 235.822 | 1.000 | -8.960  | 29.186 |
|               | Low4_pos       | 22.506* | 5.027 | 249.013 | .001  | 5.362   | 39.649 |
|               | other_neg      | -2.438  | 3.676 | 223.936 | 1.000 | -14.990 | 10.115 |
|               | other_part pos | .556    | 3.883 | 210.051 | 1.000 | -12.716 | 13.828 |
|               | other_pos      | 1.475   | 4.575 | 249.861 | 1.000 | -14.126 | 17.076 |
|               | PD_neg         | -9.119  | 3.998 | 208.127 | 1.000 | -22.788 | 4.549  |
|               | PD_part pos    | 2.232   | 4.693 | 249.391 | 1.000 | -13.772 | 18.235 |
|               | PD_pos         | 7.198   | 4.038 | 252.386 | 1.000 | -6.570  | 20.966 |
|               |                |         |       |         |       |         |        |
| Low4_part pos | ASNB_neg       | -13.263 | 5.254 | 226.078 | .810  | -31.203 | 4.676  |
|               | ASNB_part pos  | -4.614  | 5.874 | 247.844 | 1.000 | -24.645 | 15.418 |
|               | ASNB_pos       | -3.407  | 6.042 | 251.731 | 1.000 | -24.008 | 17.195 |

|           |                |          |       |         |                  |         |         |
|-----------|----------------|----------|-------|---------|------------------|---------|---------|
|           | Low4_neg       | -10.113  | 5.589 | 235.822 | 1.000            | -29.186 | 8.960   |
|           | Low4_pos       | 12.393   | 5.854 | 250.726 | 1.000            | -7.569  | 32.355  |
|           | other_neg      | -12.550  | 4.706 | 227.205 | .542             | -28.618 | 3.518   |
|           | other_part pos | -9.557   | 4.961 | 242.106 | 1.000            | -26.479 | 7.365   |
|           | other_pos      | -8.638   | 5.473 | 251.717 | 1.000            | -27.298 | 10.023  |
|           | PD_neg         | -19.232* | 5.078 | 243.999 | <b>.013</b>      | -36.551 | -1.913  |
|           | PD_part pos    | -7.881   | 5.435 | 227.927 | 1.000            | -26.436 | 10.674  |
|           | PD_pos         | -2.914   | 5.007 | 250.745 | 1.000            | -19.986 | 14.157  |
| Low4_pos  | ASNB_neg       | -25.656* | 4.692 | 249.994 | <b>&lt;0.001</b> | -41.656 | -9.656  |
|           | ASNB_part pos  | -17.007  | 5.313 | 249.444 | .102             | -35.124 | 1.111   |
|           | ASNB_pos       | -15.800  | 5.403 | 250.319 | .249             | -34.224 | 2.624   |
|           | Low4_neg       | -22.506* | 5.027 | 249.013 | <b>.001</b>      | -39.649 | -5.362  |
|           | Low4_part pos  | -12.393  | 5.854 | 250.726 | 1.000            | -32.355 | 7.569   |
|           | other_neg      | -24.943* | 4.166 | 247.793 | <b>&lt;0.001</b> | -39.151 | -10.736 |
|           | other_part pos | -21.950* | 4.334 | 252.750 | <b>&lt;0.001</b> | -36.726 | -7.173  |
|           | other_pos      | -21.031* | 4.714 | 240.566 | <b>.001</b>      | -37.114 | -4.947  |
|           | PD_neg         | -31.625* | 4.334 | 242.851 | <b>&lt;0.001</b> | -46.409 | -16.841 |
|           | PD_part pos    | -20.274* | 4.963 | 253.000 | <b>.004</b>      | -37.196 | -3.352  |
|           | PD_pos         | -15.307* | 4.361 | 249.725 | <b>.035</b>      | -30.177 | -.438   |
| other_neg | ASNB_neg       | -.713    | 3.225 | 218.400 | 1.000            | -11.731 | 10.305  |
|           | ASNB_part pos  | 7.937    | 4.213 | 252.249 | 1.000            | -6.427  | 22.301  |
|           | ASNB_pos       | 9.143    | 4.432 | 244.745 | 1.000            | -5.972  | 24.259  |
|           | Low4_neg       | 2.438    | 3.676 | 223.936 | 1.000            | -10.115 | 14.990  |
|           | Low4_part pos  | 12.550   | 4.706 | 227.205 | .542             | -3.518  | 28.618  |
|           | Low4_pos       | 24.943*  | 4.166 | 247.793 | <b>&lt;0.001</b> | 10.736  | 39.151  |
|           | other_part pos | 2.994    | 2.763 | 251.850 | 1.000            | -6.426  | 12.413  |
|           | other_pos      | 3.913    | 3.654 | 228.401 | 1.000            | -8.562  | 16.387  |
|           | PD_neg         | -6.682   | 2.932 | 252.954 | 1.000            | -16.679 | 3.315   |
|           | PD_part pos    | 4.669    | 3.719 | 250.008 | 1.000            | -8.012  | 17.350  |

|                |                |         |       |         |                  |         |        |
|----------------|----------------|---------|-------|---------|------------------|---------|--------|
|                | PD_pos         | 9.636   | 2.914 | 188.312 | .074             | -.340   | 19.611 |
| other_part pos | ASNB_neg       | -3.707  | 3.580 | 244.411 | 1.000            | -15.918 | 8.504  |
|                | ASNB_part pos  | 4.943   | 4.446 | 251.780 | 1.000            | -10.215 | 20.101 |
|                | ASNB_pos       | 6.150   | 4.575 | 252.576 | 1.000            | -9.448  | 21.747 |
|                | Low4_neg       | -.556   | 3.883 | 210.051 | 1.000            | -13.828 | 12.716 |
|                | Low4_part pos  | 9.557   | 4.961 | 242.106 | 1.000            | -7.365  | 26.479 |
|                | Low4_pos       | 21.950* | 4.334 | 252.750 | <b>&lt;0.001</b> | 7.173   | 36.726 |
|                | other_neg      | -2.994  | 2.763 | 251.850 | 1.000            | -12.413 | 6.426  |
|                | other_pos      | .919    | 3.869 | 243.292 | 1.000            | -12.279 | 14.117 |
|                | PD_neg         | -9.675  | 3.231 | 252.730 | .199             | -20.690 | 1.339  |
|                | PD_part pos    | 1.676   | 3.917 | 252.999 | 1.000            | -11.680 | 15.031 |
|                | PD_pos         | 6.642   | 3.133 | 239.380 | 1.000            | -4.046  | 17.331 |
| other_pos      | ASNB_neg       | -4.626  | 4.288 | 252.528 | 1.000            | -19.246 | 9.994  |
|                | ASNB_part pos  | 4.024   | 4.973 | 251.727 | 1.000            | -12.931 | 20.978 |
|                | ASNB_pos       | 5.231   | 5.140 | 248.565 | 1.000            | -12.297 | 22.759 |
|                | Low4_neg       | -1.475  | 4.575 | 249.861 | 1.000            | -17.076 | 14.126 |
|                | Low4_part pos  | 8.638   | 5.473 | 251.717 | 1.000            | -10.023 | 27.298 |
|                | Low4_pos       | 21.031* | 4.714 | 240.566 | <b>.001</b>      | 4.947   | 37.114 |
|                | other_neg      | -3.913  | 3.654 | 228.401 | 1.000            | -16.387 | 8.562  |
|                | other_part pos | -.919   | 3.869 | 243.292 | 1.000            | -14.117 | 12.279 |
|                | PD_neg         | -10.594 | 3.929 | 252.777 | .493             | -23.989 | 2.800  |
|                | PD_part pos    | .757    | 4.556 | 249.682 | 1.000            | -14.778 | 16.291 |
|                | PD_pos         | 5.723   | 3.852 | 242.024 | 1.000            | -7.418  | 18.865 |
| PD_neg         | ASNB_neg       | 5.969   | 3.629 | 212.034 | 1.000            | -6.435  | 18.372 |
|                | ASNB_part pos  | 14.618  | 4.472 | 246.252 | .081             | -.634   | 29.871 |
|                | ASNB_pos       | 15.825  | 4.661 | 252.795 | .052             | -.064   | 31.715 |
|                | Low4_neg       | 9.119   | 3.998 | 208.127 | 1.000            | -4.549  | 22.788 |
|                | Low4_part pos  | 19.232* | 5.078 | 243.999 | <b>.013</b>      | 1.913   | 36.551 |
|                | Low4_pos       | 31.625* | 4.334 | 242.851 | <b>&lt;0.001</b> | 16.841  | 46.409 |

|             |                |          |       |         |                  |         |        |
|-------------|----------------|----------|-------|---------|------------------|---------|--------|
|             | other_neg      | 6.682    | 2.932 | 252.954 | 1.000            | -3.315  | 16.679 |
|             | other_part pos | 9.675    | 3.231 | 252.730 | .199             | -1.339  | 20.690 |
|             | other_pos      | 10.594   | 3.929 | 252.777 | .493             | -2.800  | 23.989 |
|             | PD_part pos    | 11.351   | 4.076 | 252.650 | .380             | -2.546  | 25.248 |
|             | PD_pos         | 16.318*  | 3.311 | 238.638 | <b>&lt;0.001</b> | 5.020   | 27.615 |
| PD_part pos | ASNB_neg       | -5.382   | 4.343 | 250.253 | 1.000            | -20.192 | 9.427  |
|             | ASNB_part pos  | 3.267    | 5.077 | 252.016 | 1.000            | -14.042 | 20.577 |
|             | ASNB_pos       | 4.474    | 5.128 | 249.458 | 1.000            | -13.013 | 21.961 |
|             | Low4_neg       | -2.232   | 4.693 | 249.391 | 1.000            | -18.235 | 13.772 |
|             | Low4_part pos  | 7.881    | 5.435 | 227.927 | 1.000            | -10.674 | 26.436 |
|             | Low4_pos       | 20.274*  | 4.963 | 253.000 | <b>.004</b>      | 3.352   | 37.196 |
|             | other_neg      | -4.669   | 3.719 | 250.008 | 1.000            | -17.350 | 8.012  |
|             | other_part pos | -1.676   | 3.917 | 252.999 | 1.000            | -15.031 | 11.680 |
|             | other_pos      | -.757    | 4.556 | 249.682 | 1.000            | -16.291 | 14.778 |
|             | PD_neg         | -11.351  | 4.076 | 252.650 | .380             | -25.248 | 2.546  |
|             | PD_pos         | 4.967    | 3.890 | 252.278 | 1.000            | -8.295  | 18.228 |
| PD_pos      | ASNB_neg       | -10.349  | 3.686 | 248.901 | .355             | -22.917 | 2.220  |
|             | ASNB_part pos  | -1.699   | 4.475 | 247.800 | 1.000            | -16.961 | 13.563 |
|             | ASNB_pos       | -.492    | 4.578 | 252.837 | 1.000            | -16.099 | 15.115 |
|             | Low4_neg       | -7.198   | 4.038 | 252.386 | 1.000            | -20.966 | 6.570  |
|             | Low4_part pos  | 2.914    | 5.007 | 250.745 | 1.000            | -14.157 | 19.986 |
|             | Low4_pos       | 15.307*  | 4.361 | 249.725 | <b>.035</b>      | .438    | 30.177 |
|             | other_neg      | -9.636   | 2.914 | 188.312 | .074             | -19.611 | .340   |
|             | other_part pos | -6.642   | 3.133 | 239.380 | 1.000            | -17.331 | 4.046  |
|             | other_pos      | -5.723   | 3.852 | 242.024 | 1.000            | -18.865 | 7.418  |
|             | PD_neg         | -16.318* | 3.311 | 238.638 | <b>&lt;0.001</b> | -27.615 | -5.020 |
|             | PD_part pos    | -4.967   | 3.890 | 252.278 | 1.000            | -18.228 | 8.295  |

Based on estimated marginal means

\*. The mean difference is significant at the .05 level.

a. Dependent Variable: DHDmin.

c. Adjustment for multiple comparisons: Bonferroni.

**Table S2:** Pairwise comparisons for two-way interaction model between forelimb diagnostic anaesthesia ‘efficacy’ and ‘type’ for outcome variable DHDmax, i.e. head movement asymmetry associated with changes in pushoff between contralateral forelimbs.

Given are mean differences (in mm), standard error (in mm), degrees of freedom, significance achieved, upper and lower bounds of 95% confidence intervals for the pairwise difference (in mm).

Pairwise significant differences at  $P < 0.05$  after Bonferroni correction are indicated with ‘\*’.

Forelimb block types: ASNB: abaxial sesamoid nerve block; Low4: Low4-point nerve block; PD: palmar digital nerve block; other: all other nerve/joint blocks.

Efficacy: neg: negative block (0 to 30% perceived change); part pos: partially positive block (>30 to 70% perceived change; pos: positive block (>70% change).

#### Pairwise Comparisons<sup>a</sup>

| (I) Type x Efficacy | (J) Type x Efficacy | Mean Difference (I-J) | Std. Error | df      | Sig. <sup>c</sup> | 95% Confidence Interval for Difference <sup>c</sup> |             |
|---------------------|---------------------|-----------------------|------------|---------|-------------------|-----------------------------------------------------|-------------|
|                     |                     |                       |            |         |                   | Lower Bound                                         | Upper Bound |
| ASNB_neg            | ASNB_part pos       | 2.298                 | 3.390      | 249.107 | 1.000             | -9.262                                              | 13.857      |
|                     | ASNB_pos            | 6.951                 | 3.491      | 250.760 | 1.000             | -4.953                                              | 18.855      |
|                     | Low4_neg            | -.676                 | 3.122      | 244.193 | 1.000             | -11.323                                             | 9.972       |
|                     | Low4_part pos       | -2.786                | 3.761      | 252.989 | 1.000             | -15.607                                             | 10.035      |
|                     | Low4_pos            | 12.807*               | 3.303      | 247.593 | .009              | 1.544                                               | 24.070      |
|                     | other_neg           | -.170                 | 2.328      | 248.509 | 1.000             | -8.108                                              | 7.768       |
|                     | other_part pos      | 1.882                 | 2.542      | 252.827 | 1.000             | -6.785                                              | 10.550      |
|                     | other_pos           | .824                  | 2.993      | 244.173 | 1.000             | -9.384                                              | 11.031      |
|                     | PD_neg              | -2.731                | 2.633      | 242.959 | 1.000             | -11.713                                             | 6.250       |
|                     | PD_part pos         | 7.534                 | 3.078      | 252.995 | .994              | -2.961                                              | 18.030      |
|                     | PD_pos              | 7.583                 | 2.566      | 245.059 | .227              | -1.170                                              | 16.337      |
| ASNB_part pos       | ASNB_neg            | -2.298                | 3.390      | 249.107 | 1.000             | -13.857                                             | 9.262       |
|                     | ASNB_pos            | 4.653                 | 3.910      | 247.854 | 1.000             | -8.680                                              | 17.986      |
|                     | Low4_neg            | -2.973                | 3.601      | 251.463 | 1.000             | -15.250                                             | 9.303       |
|                     | Low4_part pos       | -5.084                | 4.152      | 251.296 | 1.000             | -19.242                                             | 9.074       |
|                     | Low4_pos            | 10.510                | 3.740      | 247.091 | .353              | -2.244                                              | 23.263      |
|                     | other_neg           | -2.468                | 2.936      | 241.675 | 1.000             | -12.482                                             | 7.547       |
|                     | other_part pos      | -.415                 | 3.099      | 243.796 | 1.000             | -10.985                                             | 10.154      |
|                     | other_pos           | -1.474                | 3.467      | 244.890 | 1.000             | -13.298                                             | 10.350      |

|               |                |         |       |         |       |         |        |
|---------------|----------------|---------|-------|---------|-------|---------|--------|
|               | PD_neg         | -5.029  | 3.174 | 252.876 | 1.000 | -15.850 | 5.791  |
|               | PD_part pos    | 5.237   | 3.551 | 248.650 | 1.000 | -6.873  | 17.346 |
|               | PD_pos         | 5.285   | 3.110 | 243.123 | 1.000 | -5.321  | 15.892 |
| ASNB_pos      | ASNB_neg       | -6.951  | 3.491 | 250.760 | 1.000 | -18.855 | 4.953  |
|               | ASNB_part pos  | -4.653  | 3.910 | 247.854 | 1.000 | -17.986 | 8.680  |
|               | Low4_neg       | -7.627  | 3.692 | 252.912 | 1.000 | -20.213 | 4.959  |
|               | Low4_part pos  | -9.737  | 4.247 | 247.901 | 1.000 | -24.221 | 4.747  |
|               | Low4_pos       | 5.856   | 3.821 | 252.494 | 1.000 | -7.171  | 18.883 |
|               | other_neg      | -7.121  | 3.063 | 234.615 | 1.000 | -17.574 | 3.332  |
|               | other_part pos | -5.069  | 3.206 | 249.853 | 1.000 | -15.999 | 5.862  |
|               | other_pos      | -6.127  | 3.572 | 243.201 | 1.000 | -18.312 | 6.058  |
|               | PD_neg         | -9.682  | 3.286 | 252.549 | .232  | -20.886 | 1.522  |
|               | PD_part pos    | .583    | 3.637 | 252.998 | 1.000 | -11.817 | 12.984 |
|               | PD_pos         | .632    | 3.214 | 251.000 | 1.000 | -10.326 | 11.590 |
| Low4_neg      | ASNB_neg       | .676    | 3.122 | 244.193 | 1.000 | -9.972  | 11.323 |
|               | ASNB_part pos  | 2.973   | 3.601 | 251.463 | 1.000 | -9.303  | 15.250 |
|               | ASNB_pos       | 7.627   | 3.692 | 252.912 | 1.000 | -4.959  | 20.213 |
|               | Low4_part pos  | -2.110  | 3.968 | 249.890 | 1.000 | -15.641 | 11.420 |
|               | Low4_pos       | 13.483* | 3.532 | 242.600 | .011  | 1.436   | 25.530 |
|               | other_neg      | .506    | 2.636 | 252.733 | 1.000 | -8.481  | 9.492  |
|               | other_part pos | 2.558   | 2.809 | 248.791 | 1.000 | -7.020  | 12.136 |
|               | other_pos      | 1.499   | 3.227 | 250.417 | 1.000 | -9.505  | 12.504 |
|               | PD_neg         | -2.056  | 2.902 | 244.406 | 1.000 | -11.953 | 7.841  |
|               | PD_part pos    | 8.210   | 3.319 | 251.995 | .927  | -3.107  | 19.527 |
|               | PD_pos         | 8.259   | 2.841 | 249.644 | .263  | -1.429  | 17.947 |
| Low4_part pos | ASNB_neg       | 2.786   | 3.761 | 252.989 | 1.000 | -10.035 | 15.607 |
|               | ASNB_part pos  | 5.084   | 4.152 | 251.296 | 1.000 | -9.074  | 19.242 |
|               | ASNB_pos       | 9.737   | 4.247 | 247.901 | 1.000 | -4.747  | 24.221 |
|               | Low4_neg       | 2.110   | 3.968 | 249.890 | 1.000 | -11.420 | 15.641 |



|           |                |          |       |         |       |         |        |
|-----------|----------------|----------|-------|---------|-------|---------|--------|
|           | Low4_pos       | 15.593*  | 4.101 | 239.460 | .012  | 1.600   | 29.586 |
|           | other_neg      | 2.616    | 3.359 | 251.993 | 1.000 | -8.837  | 14.068 |
|           | other_part pos | 4.668    | 3.510 | 248.772 | 1.000 | -7.301  | 16.637 |
|           | other_pos      | 3.609    | 3.842 | 246.192 | 1.000 | -9.492  | 16.711 |
|           | PD_neg         | .054     | 3.590 | 248.875 | 1.000 | -12.188 | 12.296 |
|           | PD_part pos    | 10.320   | 3.898 | 252.373 | .569  | -2.970  | 23.610 |
|           | PD_pos         | 10.369   | 3.521 | 246.777 | .234  | -1.640  | 22.378 |
| Low4_pos  | ASNB_neg       | -12.807* | 3.303 | 247.593 | .009  | -24.070 | -1.544 |
|           | ASNB_part pos  | -10.510  | 3.740 | 247.091 | .353  | -23.263 | 2.244  |
|           | ASNB_pos       | -5.856   | 3.821 | 252.494 | 1.000 | -18.883 | 7.171  |
|           | Low4_neg       | -13.483* | 3.532 | 242.600 | .011  | -25.530 | -1.436 |
|           | Low4_part pos  | -15.593* | 4.101 | 239.460 | .012  | -29.586 | -1.600 |
|           | other_neg      | -12.977* | 2.857 | 204.454 | .001  | -22.746 | -3.209 |
|           | other_part pos | -10.925* | 3.011 | 231.836 | .023  | -21.203 | -.647  |
|           | other_pos      | -11.984* | 3.359 | 252.956 | .028  | -23.435 | -.532  |
|           | PD_neg         | -15.539* | 3.079 | 252.727 | .000  | -26.035 | -5.042 |
|           | PD_part pos    | -5.273   | 3.472 | 244.519 | 1.000 | -17.117 | 6.571  |
|           | PD_pos         | -5.224   | 3.021 | 232.656 | 1.000 | -15.534 | 5.086  |
| other_neg | ASNB_neg       | .170     | 2.328 | 248.509 | 1.000 | -7.768  | 8.108  |
|           | ASNB_part pos  | 2.468    | 2.936 | 241.675 | 1.000 | -7.547  | 12.482 |
|           | ASNB_pos       | 7.121    | 3.063 | 234.615 | 1.000 | -3.332  | 17.574 |
|           | Low4_neg       | -.506    | 2.636 | 252.733 | 1.000 | -9.492  | 8.481  |
|           | Low4_part pos  | -2.616   | 3.359 | 251.993 | 1.000 | -14.068 | 8.837  |
|           | Low4_pos       | 12.977*  | 2.857 | 204.454 | .001  | 3.209   | 22.746 |
|           | other_part pos | 2.052    | 1.909 | 219.995 | 1.000 | -4.467  | 8.572  |
|           | other_pos      | .994     | 2.481 | 198.226 | 1.000 | -7.493  | 9.480  |
|           | PD_neg         | -2.561   | 2.047 | 238.142 | 1.000 | -9.544  | 4.421  |
|           | PD_part pos    | 7.704    | 2.584 | 239.107 | .209  | -1.113  | 16.521 |
|           | PD_pos         | 7.753*   | 1.944 | 170.904 | .007  | 1.084   | 14.422 |

|                |                |         |       |         |       |         |        |
|----------------|----------------|---------|-------|---------|-------|---------|--------|
| other_part pos | ASNB_neg       | -1.882  | 2.542 | 252.827 | 1.000 | -10.550 | 6.785  |
|                | ASNB_part pos  | .415    | 3.099 | 243.796 | 1.000 | -10.154 | 10.985 |
|                | ASNB_pos       | 5.069   | 3.206 | 249.853 | 1.000 | -5.862  | 15.999 |
|                | Low4_neg       | -2.558  | 2.809 | 248.791 | 1.000 | -12.136 | 7.020  |
|                | Low4_part pos  | -4.668  | 3.510 | 248.772 | 1.000 | -16.637 | 7.301  |
|                | Low4_pos       | 10.925* | 3.011 | 231.836 | .023  | .647    | 21.203 |
|                | other_neg      | -2.052  | 1.909 | 219.995 | 1.000 | -8.572  | 4.467  |
|                | other_pos      | -1.059  | 2.663 | 226.068 | 1.000 | -10.151 | 8.033  |
|                | PD_neg         | -4.614  | 2.268 | 248.973 | 1.000 | -12.349 | 3.121  |
|                | PD_part pos    | 5.652   | 2.756 | 251.766 | 1.000 | -3.743  | 15.047 |
|                | PD_pos         | 5.701   | 2.163 | 236.754 | .591  | -1.680  | 13.081 |
| other_pos      | ASNB_neg       | -.824   | 2.993 | 244.173 | 1.000 | -11.031 | 9.384  |
|                | ASNB_part pos  | 1.474   | 3.467 | 244.890 | 1.000 | -10.350 | 13.298 |
|                | ASNB_pos       | 6.127   | 3.572 | 243.201 | 1.000 | -6.058  | 18.312 |
|                | Low4_neg       | -1.499  | 3.227 | 250.417 | 1.000 | -12.504 | 9.505  |
|                | Low4_part pos  | -3.609  | 3.842 | 246.192 | 1.000 | -16.711 | 9.492  |
|                | Low4_pos       | 11.984* | 3.359 | 252.956 | .028  | .532    | 23.435 |
|                | other_neg      | -.994   | 2.481 | 198.226 | 1.000 | -9.480  | 7.493  |
|                | other_part pos | 1.059   | 2.663 | 226.068 | 1.000 | -8.033  | 10.151 |
|                | PD_neg         | -3.555  | 2.750 | 248.663 | 1.000 | -12.934 | 5.824  |
|                | PD_part pos    | 6.711   | 3.173 | 245.532 | 1.000 | -4.110  | 17.532 |
|                | PD_pos         | 6.760   | 2.665 | 240.066 | .780  | -2.332  | 15.851 |
| PD_neg         | ASNB_neg       | 2.731   | 2.633 | 242.959 | 1.000 | -6.250  | 11.713 |
|                | ASNB_part pos  | 5.029   | 3.174 | 252.876 | 1.000 | -5.791  | 15.850 |
|                | ASNB_pos       | 9.682   | 3.286 | 252.549 | .232  | -1.522  | 20.886 |
|                | Low4_neg       | 2.056   | 2.902 | 244.406 | 1.000 | -7.841  | 11.953 |
|                | Low4_part pos  | -.054   | 3.590 | 248.875 | 1.000 | -12.296 | 12.188 |
|                | Low4_pos       | 15.539* | 3.079 | 252.727 | .000  | 5.042   | 26.035 |
|                | other_neg      | 2.561   | 2.047 | 238.142 | 1.000 | -4.421  | 9.544  |

|             |                |          |       |         |       |         |        |
|-------------|----------------|----------|-------|---------|-------|---------|--------|
|             | other_part pos | 4.614    | 2.268 | 248.973 | 1.000 | -3.121  | 12.349 |
|             | other_pos      | 3.555    | 2.750 | 248.663 | 1.000 | -5.824  | 12.934 |
|             | PD_part pos    | 10.266*  | 2.859 | 250.598 | .026  | .516    | 20.016 |
|             | PD_pos         | 10.315*  | 2.289 | 240.489 | .001  | 2.504   | 18.125 |
| PD_part pos | ASNB_neg       | -7.534   | 3.078 | 252.995 | .994  | -18.030 | 2.961  |
|             | ASNB_part pos  | -5.237   | 3.551 | 248.650 | 1.000 | -17.346 | 6.873  |
|             | ASNB_pos       | -.583    | 3.637 | 252.998 | 1.000 | -12.984 | 11.817 |
|             | Low4_neg       | -8.210   | 3.319 | 251.995 | .927  | -19.527 | 3.107  |
|             | Low4_part pos  | -10.320  | 3.898 | 252.373 | .569  | -23.610 | 2.970  |
|             | Low4_pos       | 5.273    | 3.472 | 244.519 | 1.000 | -6.571  | 17.117 |
|             | other_neg      | -7.704   | 2.584 | 239.107 | .209  | -16.521 | 1.113  |
|             | other_part pos | -5.652   | 2.756 | 251.766 | 1.000 | -15.047 | 3.743  |
|             | other_pos      | -6.711   | 3.173 | 245.532 | 1.000 | -17.532 | 4.110  |
|             | PD_neg         | -10.266* | 2.859 | 250.598 | .026  | -20.016 | -.516  |
|             | PD_pos         | .049     | 2.756 | 252.494 | 1.000 | -9.349  | 9.447  |
|             |                |          |       |         |       |         |        |
| PD_pos      | ASNB_neg       | -7.583   | 2.566 | 245.059 | .227  | -16.337 | 1.170  |
|             | ASNB_part pos  | -5.285   | 3.110 | 243.123 | 1.000 | -15.892 | 5.321  |
|             | ASNB_pos       | -.632    | 3.214 | 251.000 | 1.000 | -11.590 | 10.326 |
|             | Low4_neg       | -8.259   | 2.841 | 249.644 | .263  | -17.947 | 1.429  |
|             | Low4_part pos  | -10.369  | 3.521 | 246.777 | .234  | -22.378 | 1.640  |
|             | Low4_pos       | 5.224    | 3.021 | 232.656 | 1.000 | -5.086  | 15.534 |
|             | other_neg      | -7.753*  | 1.944 | 170.904 | .007  | -14.422 | -1.084 |
|             | other_part pos | -5.701   | 2.163 | 236.754 | .591  | -13.081 | 1.680  |
|             | other_pos      | -6.760   | 2.665 | 240.066 | .780  | -15.851 | 2.332  |
|             | PD_neg         | -10.315* | 2.289 | 240.489 | .001  | -18.125 | -2.504 |
|             | PD_part pos    | -.049    | 2.756 | 252.494 | 1.000 | -9.447  | 9.349  |
|             |                |          |       |         |       |         |        |

Based on estimated marginal means

\*. The mean difference is significant at the .05 level.

a. Dependent Variable: DHDmax.

c. Adjustment for multiple comparisons: Bonferroni.

**Table S3:** Pairwise comparisons for two-way interaction model between forelimb diagnostic anaesthesia ‘efficacy’ and ‘type’ for outcome variable DHDup, i.e. head movement asymmetry associated with changes in upward movement amplitudes between stride halves.

Given are mean differences (in mm), standard error (in mm), degrees of freedom, significance achieved, upper and lower bounds of 95% confidence intervals for the pairwise difference (in mm). Pairwise significant differences at  $P < 0.05$  after Bonferroni correction are indicated with ‘\*’.

Forelimb block types: ASNB: abaxial sesamoid nerve block; Low4: Low4-point nerve block; PD: palmar digital nerve block; other: all other nerve/joint blocks.

Efficacy: neg: negative block (0 to 30% perceived change); part pos: partially positive block (>30 to 70% perceived change; pos: positive block (>70% change).

#### Pairwise Comparisons<sup>a</sup>

| (I) Type x Efficacy | (J) Type x Efficacy | Mean Difference (I-J) | Std. Error | df      | Sig. <sup>c</sup> | 95% Confidence Interval for Difference <sup>c</sup> |             |
|---------------------|---------------------|-----------------------|------------|---------|-------------------|-----------------------------------------------------|-------------|
|                     |                     |                       |            |         |                   | Lower Bound                                         | Upper Bound |
| ASNB_neg            | ASNB_part pos       | 10.281                | 7.347      | 252.084 | 1.000             | -14.771                                             | 35.332      |
|                     | ASNB_pos            | 17.230                | 7.562      | 252.090 | 1.000             | -8.552                                              | 43.012      |
|                     | Low4_neg            | 2.490                 | 6.670      | 231.882 | 1.000             | -20.277                                             | 25.256      |
|                     | Low4_part pos       | 9.162                 | 8.096      | 247.992 | 1.000             | -18.447                                             | 36.771      |
|                     | Low4_pos            | 36.713*               | 7.160      | 252.492 | .000              | 12.302                                              | 61.125      |
|                     | other_neg           | .560                  | 4.987      | 239.662 | 1.000             | -16.453                                             | 17.574      |
|                     | other_part pos      | 5.566                 | 5.485      | 252.212 | 1.000             | -13.136                                             | 24.268      |
|                     | other_pos           | 4.077                 | 6.506      | 248.277 | 1.000             | -18.110                                             | 26.264      |
|                     | PD_neg              | -7.460                | 5.625      | 232.598 | 1.000             | -26.658                                             | 11.738      |
|                     | PD_part pos         | 12.611                | 6.641      | 252.558 | 1.000             | -10.030                                             | 35.252      |
|                     | PD_pos              | 16.760                | 5.580      | 247.080 | .194              | -2.271                                              | 35.790      |
| ASNB_part pos       | ASNB_neg            | -10.281               | 7.347      | 252.084 | 1.000             | -35.332                                             | 14.771      |
|                     | ASNB_pos            | 6.949                 | 8.489      | 249.310 | 1.000             | -21.997                                             | 35.895      |
|                     | Low4_neg            | -7.791                | 7.785      | 252.973 | 1.000             | -34.334                                             | 18.751      |
|                     | Low4_part pos       | -1.118                | 8.980      | 252.996 | 1.000             | -31.736                                             | 29.499      |
|                     | Low4_pos            | 26.433                | 8.109      | 252.477 | .084              | -1.214                                              | 54.079      |
|                     | other_neg           | -9.720                | 6.388      | 247.129 | 1.000             | -31.506                                             | 12.066      |
|                     | other_part pos      | -4.715                | 6.739      | 247.321 | 1.000             | -27.698                                             | 18.269      |

|               |                |          |       |         |       |         |        |
|---------------|----------------|----------|-------|---------|-------|---------|--------|
|               | other_pos      | -6.204   | 7.538 | 247.429 | 1.000 | -31.909 | 19.502 |
|               | PD_neg         | -17.741  | 6.848 | 252.355 | .669  | -41.089 | 5.608  |
|               | PD_part pos    | 2.331    | 7.705 | 250.081 | 1.000 | -23.944 | 28.605 |
|               | PD_pos         | 6.479    | 6.768 | 244.886 | 1.000 | -16.606 | 29.563 |
| ASNB_pos      | ASNB_neg       | -17.230  | 7.562 | 252.090 | 1.000 | -43.012 | 8.552  |
|               | ASNB_part pos  | -6.949   | 8.489 | 249.310 | 1.000 | -35.895 | 21.997 |
|               | Low4_neg       | -14.740  | 7.968 | 252.747 | 1.000 | -41.906 | 12.426 |
|               | Low4_part pos  | -8.068   | 9.209 | 252.159 | 1.000 | -39.467 | 23.331 |
|               | Low4_pos       | 19.484   | 8.255 | 252.964 | 1.000 | -8.661  | 47.628 |
|               | other_neg      | -16.669  | 6.687 | 239.029 | .881  | -39.483 | 6.144  |
|               | other_part pos | -11.664  | 6.950 | 251.074 | 1.000 | -35.362 | 12.034 |
|               | other_pos      | -13.153  | 7.775 | 244.940 | 1.000 | -39.672 | 13.366 |
|               | PD_neg         | -24.690* | 7.104 | 252.927 | .040  | -48.909 | -.471  |
|               | PD_part pos    | -4.618   | 7.844 | 252.440 | 1.000 | -31.364 | 22.127 |
|               | PD_pos         | -.470    | 6.961 | 251.928 | 1.000 | -24.204 | 23.263 |
| Low4_neg      | ASNB_neg       | -2.490   | 6.670 | 231.882 | 1.000 | -25.256 | 20.277 |
|               | ASNB_part pos  | 7.791    | 7.785 | 252.973 | 1.000 | -18.751 | 34.334 |
|               | ASNB_pos       | 14.740   | 7.968 | 252.747 | 1.000 | -12.426 | 41.906 |
|               | Low4_part pos  | 6.673    | 8.579 | 252.399 | 1.000 | -22.576 | 35.922 |
|               | Low4_pos       | 34.224*  | 7.670 | 251.830 | .001  | 8.073   | 60.375 |
|               | other_neg      | -1.929   | 5.668 | 246.612 | 1.000 | -21.260 | 17.402 |
|               | other_part pos | 3.076    | 6.014 | 236.927 | 1.000 | -17.446 | 23.599 |
|               | other_pos      | 1.588    | 6.986 | 252.904 | 1.000 | -22.230 | 25.405 |
|               | PD_neg         | -9.950   | 6.201 | 232.278 | 1.000 | -31.113 | 11.214 |
|               | PD_part pos    | 10.122   | 7.173 | 252.951 | 1.000 | -14.335 | 34.579 |
|               | PD_pos         | 14.270   | 6.154 | 252.535 | 1.000 | -6.713  | 35.253 |
| Low4_part pos | ASNB_neg       | -9.162   | 8.096 | 247.992 | 1.000 | -36.771 | 18.447 |
|               | ASNB_part pos  | 1.118    | 8.980 | 252.996 | 1.000 | -29.499 | 31.736 |
|               | ASNB_pos       | 8.068    | 9.209 | 252.159 | 1.000 | -23.331 | 39.467 |

|           |                |          |       |         |       |         |         |
|-----------|----------------|----------|-------|---------|-------|---------|---------|
|           | Low4_neg       | -6.673   | 8.579 | 252.399 | 1.000 | -35.922 | 22.576  |
|           | Low4_pos       | 27.551   | 8.919 | 250.487 | .147  | -2.860  | 57.963  |
|           | other_neg      | -8.602   | 7.245 | 249.992 | 1.000 | -33.307 | 16.103  |
|           | other_part pos | -3.596   | 7.597 | 252.965 | 1.000 | -29.498 | 22.305  |
|           | other_pos      | -5.085   | 8.337 | 251.522 | 1.000 | -33.512 | 23.342  |
|           | PD_neg         | -16.622  | 7.771 | 252.995 | 1.000 | -43.118 | 9.873   |
|           | PD_part pos    | 3.449    | 8.377 | 246.113 | 1.000 | -25.121 | 32.020  |
|           | PD_pos         | 7.597    | 7.636 | 252.345 | 1.000 | -18.439 | 33.634  |
| Low4_pos  | ASNB_neg       | -36.713* | 7.160 | 252.492 | .000  | -61.125 | -12.302 |
|           | ASNB_part pos  | -26.433  | 8.109 | 252.477 | .084  | -54.079 | 1.214   |
|           | ASNB_pos       | -19.484  | 8.255 | 252.964 | 1.000 | -47.628 | 8.661   |
|           | Low4_neg       | -34.224* | 7.670 | 251.830 | .001  | -60.375 | -8.073  |
|           | Low4_part pos  | -27.551  | 8.919 | 250.487 | .147  | -57.963 | 2.860   |
|           | other_neg      | -36.153* | 6.277 | 226.800 | .000  | -57.584 | -14.722 |
|           | other_part pos | -31.148* | 6.570 | 244.145 | .000  | -53.557 | -8.738  |
|           | other_pos      | -32.636* | 7.236 | 250.857 | .001  | -57.309 | -7.963  |
|           | PD_neg         | -44.174* | 6.644 | 252.142 | .000  | -66.826 | -21.521 |
|           | PD_part pos    | -24.102  | 7.544 | 250.026 | .104  | -49.826 | 1.622   |
|           | PD_pos         | -19.954  | 6.593 | 241.321 | .181  | -42.447 | 2.539   |
| other_neg | ASNB_neg       | -.560    | 4.987 | 239.662 | 1.000 | -17.574 | 16.453  |
|           | ASNB_part pos  | 9.720    | 6.388 | 247.129 | 1.000 | -12.066 | 31.506  |
|           | ASNB_pos       | 16.669   | 6.687 | 239.029 | .881  | -6.144  | 39.483  |
|           | Low4_neg       | 1.929    | 5.668 | 246.612 | 1.000 | -17.402 | 21.260  |
|           | Low4_part pos  | 8.602    | 7.245 | 249.992 | 1.000 | -16.103 | 33.307  |
|           | Low4_pos       | 36.153*  | 6.277 | 226.800 | .000  | 14.722  | 57.584  |
|           | other_part pos | 5.006    | 4.178 | 237.500 | 1.000 | -9.249  | 19.260  |
|           | other_pos      | 3.517    | 5.468 | 210.501 | 1.000 | -15.172 | 22.206  |
|           | PD_neg         | -8.020   | 4.455 | 248.281 | 1.000 | -23.212 | 7.171   |
|           | PD_part pos    | 12.051   | 5.629 | 245.054 | 1.000 | -7.148  | 31.250  |
|           |                |          |       |         |       |         |         |

|                |                |         |       |         |       |         |        |
|----------------|----------------|---------|-------|---------|-------|---------|--------|
|                | PD_pos         | 16.199* | 4.317 | 180.858 | .016  | 1.409   | 30.990 |
| other_part pos | ASNB_neg       | -5.566  | 5.485 | 252.212 | 1.000 | -24.268 | 13.136 |
|                | ASNB_part pos  | 4.715   | 6.739 | 247.321 | 1.000 | -18.269 | 27.698 |
|                | ASNB_pos       | 11.664  | 6.950 | 251.074 | 1.000 | -12.034 | 35.362 |
|                | Low4_neg       | -3.076  | 6.014 | 236.927 | 1.000 | -23.599 | 17.446 |
|                | Low4_part pos  | 3.596   | 7.597 | 252.965 | 1.000 | -22.305 | 29.498 |
|                | Low4_pos       | 31.148* | 6.570 | 244.145 | .000  | 8.738   | 53.557 |
|                | other_neg      | -5.006  | 4.178 | 237.500 | 1.000 | -19.260 | 9.249  |
|                | other_pos      | -1.489  | 5.828 | 232.705 | 1.000 | -21.379 | 18.402 |
|                | PD_neg         | -13.026 | 4.918 | 251.794 | .567  | -29.794 | 3.742  |
|                | PD_part pos    | 7.045   | 5.963 | 252.524 | 1.000 | -13.286 | 27.377 |
|                | PD_pos         | 11.194  | 4.720 | 237.998 | 1.000 | -4.912  | 27.300 |
| other_pos      | ASNB_neg       | -4.077  | 6.506 | 248.277 | 1.000 | -26.264 | 18.110 |
|                | ASNB_part pos  | 6.204   | 7.538 | 247.429 | 1.000 | -19.502 | 31.909 |
|                | ASNB_pos       | 13.153  | 7.775 | 244.940 | 1.000 | -13.366 | 39.672 |
|                | Low4_neg       | -1.588  | 6.986 | 252.904 | 1.000 | -25.405 | 22.230 |
|                | Low4_part pos  | 5.085   | 8.337 | 251.522 | 1.000 | -23.342 | 33.512 |
|                | Low4_pos       | 32.636* | 7.236 | 250.857 | .001  | 7.963   | 57.309 |
|                | other_neg      | -3.517  | 5.468 | 210.501 | 1.000 | -22.206 | 15.172 |
|                | other_part pos | 1.489   | 5.828 | 232.705 | 1.000 | -18.402 | 21.379 |
|                | PD_neg         | -11.537 | 5.968 | 250.428 | 1.000 | -31.886 | 8.811  |
|                | PD_part pos    | 8.534   | 6.898 | 246.937 | 1.000 | -14.991 | 32.060 |
|                | PD_pos         | 12.682  | 5.810 | 240.032 | 1.000 | -7.139  | 32.504 |
| PD_neg         | ASNB_neg       | 7.460   | 5.625 | 232.598 | 1.000 | -11.738 | 26.658 |
|                | ASNB_part pos  | 17.741  | 6.848 | 252.355 | .669  | -5.608  | 41.089 |
|                | ASNB_pos       | 24.690* | 7.104 | 252.927 | .040  | .471    | 48.909 |
|                | Low4_neg       | 9.950   | 6.201 | 232.278 | 1.000 | -11.214 | 31.113 |
|                | Low4_part pos  | 16.622  | 7.771 | 252.995 | 1.000 | -9.873  | 43.118 |
|                | Low4_pos       | 44.174* | 6.644 | 252.142 | .000  | 21.521  | 66.826 |



|             |                |          |       |         |       |         |        |
|-------------|----------------|----------|-------|---------|-------|---------|--------|
|             | other_neg      | 8.020    | 4.455 | 248.281 | 1.000 | -7.171  | 23.212 |
|             | other_part pos | 13.026   | 4.918 | 251.794 | .567  | -3.742  | 29.794 |
|             | other_pos      | 11.537   | 5.968 | 250.428 | 1.000 | -8.811  | 31.886 |
|             | PD_part pos    | 20.071   | 6.196 | 251.680 | .090  | -1.053  | 41.196 |
|             | PD_pos         | 24.220*  | 4.991 | 240.113 | .000  | 7.193   | 41.246 |
| PD_part pos | ASNB_neg       | -12.611  | 6.641 | 252.558 | 1.000 | -35.252 | 10.030 |
|             | ASNB_part pos  | -2.331   | 7.705 | 250.081 | 1.000 | -28.605 | 23.944 |
|             | ASNB_pos       | 4.618    | 7.844 | 252.440 | 1.000 | -22.127 | 31.364 |
|             | Low4_neg       | -10.122  | 7.173 | 252.951 | 1.000 | -34.579 | 14.335 |
|             | Low4_part pos  | -3.449   | 8.377 | 246.113 | 1.000 | -32.020 | 25.121 |
|             | Low4_pos       | 24.102   | 7.544 | 250.026 | .104  | -1.622  | 49.826 |
|             | other_neg      | -12.051  | 5.629 | 245.054 | 1.000 | -31.250 | 7.148  |
|             | other_part pos | -7.045   | 5.963 | 252.524 | 1.000 | -27.377 | 13.286 |
|             | other_pos      | -8.534   | 6.898 | 246.937 | 1.000 | -32.060 | 14.991 |
|             | PD_neg         | -20.071  | 6.196 | 251.680 | .090  | -41.196 | 1.053  |
|             | PD_pos         | 4.148    | 5.940 | 252.556 | 1.000 | -16.105 | 24.401 |
| PD_pos      | ASNB_neg       | -16.760  | 5.580 | 247.080 | .194  | -35.790 | 2.271  |
|             | ASNB_part pos  | -6.479   | 6.768 | 244.886 | 1.000 | -29.563 | 16.606 |
|             | ASNB_pos       | .470     | 6.961 | 251.928 | 1.000 | -23.263 | 24.204 |
|             | Low4_neg       | -14.270  | 6.154 | 252.535 | 1.000 | -35.253 | 6.713  |
|             | Low4_part pos  | -7.597   | 7.636 | 252.345 | 1.000 | -33.634 | 18.439 |
|             | Low4_pos       | 19.954   | 6.593 | 241.321 | .181  | -2.539  | 42.447 |
|             | other_neg      | -16.199* | 4.317 | 180.858 | .016  | -30.990 | -1.409 |
|             | other_part pos | -11.194  | 4.720 | 237.998 | 1.000 | -27.300 | 4.912  |
|             | other_pos      | -12.682  | 5.810 | 240.032 | 1.000 | -32.504 | 7.139  |
|             | PD_neg         | -24.220* | 4.991 | 240.113 | .000  | -41.246 | -7.193 |
|             | PD_part pos    | -4.148   | 5.940 | 252.556 | 1.000 | -24.401 | 16.105 |

Based on estimated marginal means

\*. The mean difference is significant at the .05 level.

a. Dependent Variable: DHDup.

c. Adjustment for multiple comparisons: Bonferroni.

**Table S4:** Pairwise comparisons for two-way interaction model between forelimb diagnostic anaesthesia ‘efficacy’ and ‘type’ for outcome variable DPDmax, i.e. compensatory pelvic movement asymmetry associated with changes in pushoff between contralateral hind limbs.

Given are mean differences (in mm), standard error (in mm), degrees of freedom, significance achieved, upper and lower bounds of 95% confidence intervals for the pairwise difference (in mm). Pairwise significant differences at  $P < 0.05$  after Bonferroni correction are indicated with ‘\*’.

Forelimb block types: ASNB: abaxial sesamoid nerve block; Low4: Low4-point nerve block; PD: palmar digital nerve block; other: all other nerve/joint blocks.

Efficacy: neg: negative block (0 to 30% perceived change); part pos: partially positive block (>30 to 70% perceived change; pos: positive block (>70% change).

#### Pairwise Comparisons<sup>a</sup>

| (I) Type x Efficacy | (J) Type x Efficacy | Mean Difference (I-J) | Std. Error | df      | Sig. <sup>c</sup> | 95% Confidence Interval for Difference <sup>c</sup> |             |
|---------------------|---------------------|-----------------------|------------|---------|-------------------|-----------------------------------------------------|-------------|
|                     |                     |                       |            |         |                   | Lower Bound                                         | Upper Bound |
| ASNB_neg            | ASNB_part pos       | -.262                 | 1.568      | 218.946 | 1.000             | -5.617                                              | 5.094       |
|                     | ASNB_pos            | 2.661                 | 1.647      | 235.621 | 1.000             | -2.960                                              | 8.282       |
|                     | Low4_neg            | 2.198                 | 1.310      | 180.401 | 1.000             | -2.289                                              | 6.684       |
|                     | Low4_part pos       | 1.402                 | 1.623      | 186.797 | 1.000             | -4.154                                              | 6.959       |
|                     | Low4_pos            | -2.830                | 1.502      | 208.871 | 1.000             | -7.965                                              | 2.305       |
|                     | other_neg           | 1.699                 | .995       | 187.928 | 1.000             | -1.707                                              | 5.104       |
|                     | other_part pos      | .626                  | 1.137      | 205.055 | 1.000             | -3.264                                              | 4.515       |
|                     | other_pos           | .535                  | 1.411      | 225.271 | 1.000             | -4.281                                              | 5.352       |
|                     | PD_neg              | 2.458                 | 1.119      | 190.911 | 1.000             | -1.372                                              | 6.289       |
|                     | PD_part pos         | .114                  | 1.424      | 233.320 | 1.000             | -4.746                                              | 4.974       |
|                     | PD_pos              | -1.796                | 1.256      | 249.395 | 1.000             | -6.079                                              | 2.487       |
| ASNB_part pos       | ASNB_neg            | .262                  | 1.568      | 218.946 | 1.000             | -5.094                                              | 5.617       |
|                     | ASNB_pos            | 2.922                 | 1.869      | 237.418 | 1.000             | -3.454                                              | 9.299       |
|                     | Low4_neg            | 2.459                 | 1.628      | 209.074 | 1.000             | -3.104                                              | 8.022       |
|                     | Low4_part pos       | 1.664                 | 1.875      | 207.647 | 1.000             | -4.746                                              | 8.073       |
|                     | Low4_pos            | -2.569                | 1.696      | 206.561 | 1.000             | -8.366                                              | 3.229       |
|                     | other_neg           | 1.960                 | 1.386      | 224.452 | 1.000             | -2.773                                              | 6.694       |
|                     | other_part pos      | .887                  | 1.469      | 227.022 | 1.000             | -4.127                                              | 5.902       |

|               |                |        |       |         |       |         |       |
|---------------|----------------|--------|-------|---------|-------|---------|-------|
|               | other_pos      | .797   | 1.643 | 227.442 | 1.000 | -4.813  | 6.407 |
|               | PD_neg         | 2.720  | 1.432 | 211.921 | 1.000 | -2.173  | 7.613 |
|               | PD_part pos    | .376   | 1.698 | 239.298 | 1.000 | -5.417  | 6.168 |
|               | PD_pos         | -1.534 | 1.517 | 245.267 | 1.000 | -6.707  | 3.638 |
| ASNB_pos      | ASNB_neg       | -2.661 | 1.647 | 235.621 | 1.000 | -8.282  | 2.960 |
|               | ASNB_part pos  | -2.922 | 1.869 | 237.418 | 1.000 | -9.299  | 3.454 |
|               | Low4_neg       | -.463  | 1.694 | 225.425 | 1.000 | -6.248  | 5.322 |
|               | Low4_part pos  | -1.259 | 1.956 | 218.650 | 1.000 | -7.941  | 5.424 |
|               | Low4_pos       | -5.491 | 1.756 | 224.581 | .132  | -11.488 | .506  |
|               | other_neg      | -.962  | 1.500 | 242.356 | 1.000 | -6.081  | 4.156 |
|               | other_part pos | -2.035 | 1.524 | 237.225 | 1.000 | -7.237  | 3.166 |
|               | other_pos      | -2.126 | 1.730 | 240.179 | 1.000 | -8.027  | 3.776 |
|               | PD_neg         | -.203  | 1.544 | 236.966 | 1.000 | -5.471  | 5.066 |
|               | PD_part pos    | -2.547 | 1.672 | 228.085 | 1.000 | -8.254  | 3.160 |
|               | PD_pos         | -4.457 | 1.530 | 241.322 | .259  | -9.677  | .763  |
| Low4_neg      | ASNB_neg       | -2.198 | 1.310 | 180.401 | 1.000 | -6.684  | 2.289 |
|               | ASNB_part pos  | -2.459 | 1.628 | 209.074 | 1.000 | -8.022  | 3.104 |
|               | ASNB_pos       | .463   | 1.694 | 225.425 | 1.000 | -5.322  | 6.248 |
|               | Low4_part pos  | -.795  | 1.734 | 186.548 | 1.000 | -6.734  | 5.143 |
|               | Low4_pos       | -5.028 | 1.595 | 201.007 | .123  | -10.484 | .428  |
|               | other_neg      | -.499  | 1.130 | 182.301 | 1.000 | -4.370  | 3.373 |
|               | other_part pos | -1.572 | 1.184 | 180.419 | 1.000 | -5.630  | 2.486 |
|               | other_pos      | -1.662 | 1.468 | 210.995 | 1.000 | -6.680  | 3.356 |
|               | PD_neg         | .261   | 1.224 | 184.858 | 1.000 | -3.931  | 4.453 |
|               | PD_part pos    | -2.084 | 1.522 | 224.345 | 1.000 | -7.280  | 3.113 |
|               | PD_pos         | -3.993 | 1.329 | 235.430 | .195  | -8.529  | .543  |
| Low4_part pos | ASNB_neg       | -1.402 | 1.623 | 186.797 | 1.000 | -6.959  | 4.154 |
|               | ASNB_part pos  | -1.664 | 1.875 | 207.647 | 1.000 | -8.073  | 4.746 |
|               | ASNB_pos       | 1.259  | 1.956 | 218.650 | 1.000 | -5.424  | 7.941 |

|           |                |        |       |         |       |         |        |
|-----------|----------------|--------|-------|---------|-------|---------|--------|
|           | Low4_neg       | .795   | 1.734 | 186.548 | 1.000 | -5.143  | 6.734  |
|           | Low4_pos       | -4.232 | 1.864 | 202.354 | 1.000 | -10.607 | 2.142  |
|           | other_neg      | .296   | 1.449 | 183.479 | 1.000 | -4.668  | 5.261  |
|           | other_part pos | -.777  | 1.554 | 192.613 | 1.000 | -6.096  | 4.543  |
|           | other_pos      | -.867  | 1.759 | 209.780 | 1.000 | -6.878  | 5.144  |
|           | PD_neg         | 1.056  | 1.600 | 198.158 | 1.000 | -4.419  | 6.531  |
|           | PD_part pos    | -1.288 | 1.697 | 198.961 | 1.000 | -7.094  | 4.517  |
|           | PD_pos         | -3.198 | 1.617 | 219.603 | 1.000 | -8.721  | 2.325  |
| Low4_pos  | ASNB_neg       | 2.830  | 1.502 | 208.871 | 1.000 | -2.305  | 7.965  |
|           | ASNB_part pos  | 2.569  | 1.696 | 206.561 | 1.000 | -3.229  | 8.366  |
|           | ASNB_pos       | 5.491  | 1.756 | 224.581 | .132  | -.506   | 11.488 |
|           | Low4_neg       | 5.028  | 1.595 | 201.007 | .123  | -.428   | 10.484 |
|           | Low4_part pos  | 4.232  | 1.864 | 202.354 | 1.000 | -2.142  | 10.607 |
|           | other_neg      | 4.529  | 1.367 | 217.476 | .071  | -.139   | 9.197  |
|           | other_part pos | 3.456  | 1.410 | 215.723 | .992  | -1.361  | 8.272  |
|           | other_pos      | 3.366  | 1.492 | 204.452 | 1.000 | -1.736  | 8.467  |
|           | PD_neg         | 5.289* | 1.373 | 204.361 | .010  | .592    | 9.985  |
|           | PD_part pos    | 2.944  | 1.631 | 229.566 | 1.000 | -2.625  | 8.513  |
|           | PD_pos         | 1.034  | 1.457 | 238.517 | 1.000 | -3.938  | 6.007  |
| other_neg | ASNB_neg       | -1.699 | .995  | 187.928 | 1.000 | -5.104  | 1.707  |
|           | ASNB_part pos  | -1.960 | 1.386 | 224.452 | 1.000 | -6.694  | 2.773  |
|           | ASNB_pos       | .962   | 1.500 | 242.356 | 1.000 | -4.156  | 6.081  |
|           | Low4_neg       | .499   | 1.130 | 182.301 | 1.000 | -3.373  | 4.370  |
|           | Low4_part pos  | -.296  | 1.449 | 183.479 | 1.000 | -5.261  | 4.668  |
|           | Low4_pos       | -4.529 | 1.367 | 217.476 | .071  | -9.197  | .139   |
|           | other_part pos | -1.073 | .896  | 209.597 | 1.000 | -4.135  | 1.989  |
|           | other_pos      | -1.163 | 1.237 | 234.340 | 1.000 | -5.384  | 3.058  |
|           | PD_neg         | .760   | .950  | 214.047 | 1.000 | -2.486  | 4.005  |
|           | PD_part pos    | -1.585 | 1.250 | 241.505 | 1.000 | -5.848  | 2.679  |

|                |                |         |       |         |       |        |       |
|----------------|----------------|---------|-------|---------|-------|--------|-------|
|                | PD_pos         | -3.494  | 1.047 | 252.593 | .064  | -7.064 | .075  |
| other_part pos | ASNB_neg       | -.626   | 1.137 | 205.055 | 1.000 | -4.515 | 3.264 |
|                | ASNB_part pos  | -.887   | 1.469 | 227.022 | 1.000 | -5.902 | 4.127 |
|                | ASNB_pos       | 2.035   | 1.524 | 237.225 | 1.000 | -3.166 | 7.237 |
|                | Low4_neg       | 1.572   | 1.184 | 180.419 | 1.000 | -2.486 | 5.630 |
|                | Low4_part pos  | .777    | 1.554 | 192.613 | 1.000 | -4.543 | 6.096 |
|                | Low4_pos       | -3.456  | 1.410 | 215.723 | .992  | -8.272 | 1.361 |
|                | other_neg      | 1.073   | .896  | 209.597 | 1.000 | -1.989 | 4.135 |
|                | other_pos      | -.090   | 1.294 | 230.811 | 1.000 | -4.507 | 4.327 |
|                | PD_neg         | 1.833   | 1.052 | 219.614 | 1.000 | -1.759 | 5.425 |
|                | PD_part pos    | -.512   | 1.301 | 237.180 | 1.000 | -4.950 | 3.927 |
|                | PD_pos         | -2.421  | 1.081 | 250.977 | 1.000 | -6.108 | 1.266 |
| other_pos      | ASNB_neg       | -.535   | 1.411 | 225.271 | 1.000 | -5.352 | 4.281 |
|                | ASNB_part pos  | -.797   | 1.643 | 227.442 | 1.000 | -6.407 | 4.813 |
|                | ASNB_pos       | 2.126   | 1.730 | 240.179 | 1.000 | -3.776 | 8.027 |
|                | Low4_neg       | 1.662   | 1.468 | 210.995 | 1.000 | -3.356 | 6.680 |
|                | Low4_part pos  | .867    | 1.759 | 209.780 | 1.000 | -5.144 | 6.878 |
|                | Low4_pos       | -3.366  | 1.492 | 204.452 | 1.000 | -8.467 | 1.736 |
|                | other_neg      | 1.163   | 1.237 | 234.340 | 1.000 | -3.058 | 5.384 |
|                | other_part pos | .090    | 1.294 | 230.811 | 1.000 | -4.327 | 4.507 |
|                | PD_neg         | 1.923   | 1.295 | 227.929 | 1.000 | -2.499 | 6.345 |
|                | PD_part pos    | -.421   | 1.533 | 241.373 | 1.000 | -5.652 | 4.809 |
|                | PD_pos         | -2.331  | 1.318 | 247.957 | 1.000 | -6.828 | 2.165 |
| PD_neg         | ASNB_neg       | -2.458  | 1.119 | 190.911 | 1.000 | -6.289 | 1.372 |
|                | ASNB_part pos  | -2.720  | 1.432 | 211.921 | 1.000 | -7.613 | 2.173 |
|                | ASNB_pos       | .203    | 1.544 | 236.966 | 1.000 | -5.066 | 5.471 |
|                | Low4_neg       | -.261   | 1.224 | 184.858 | 1.000 | -4.453 | 3.931 |
|                | Low4_part pos  | -1.056  | 1.600 | 198.158 | 1.000 | -6.531 | 4.419 |
|                | Low4_pos       | -5.289* | 1.373 | 204.361 | .010  | -9.985 | -.592 |

|             |                |         |       |         |       |        |       |
|-------------|----------------|---------|-------|---------|-------|--------|-------|
|             | other_neg      | -.760   | .950  | 214.047 | 1.000 | -4.005 | 2.486 |
|             | other_part pos | -1.833  | 1.052 | 219.614 | 1.000 | -5.425 | 1.759 |
|             | other_pos      | -1.923  | 1.295 | 227.929 | 1.000 | -6.345 | 2.499 |
|             | PD_part pos    | -2.344  | 1.367 | 243.169 | 1.000 | -7.007 | 2.319 |
|             | PD_pos         | -4.254* | 1.154 | 252.915 | .018  | -8.189 | -.319 |
| PD_part pos | ASNB_neg       | -.114   | 1.424 | 233.320 | 1.000 | -4.974 | 4.746 |
|             | ASNB_part pos  | -.376   | 1.698 | 239.298 | 1.000 | -6.168 | 5.417 |
|             | ASNB_pos       | 2.547   | 1.672 | 228.085 | 1.000 | -3.160 | 8.254 |
|             | Low4_neg       | 2.084   | 1.522 | 224.345 | 1.000 | -3.113 | 7.280 |
|             | Low4_part pos  | 1.288   | 1.697 | 198.961 | 1.000 | -4.517 | 7.094 |
|             | Low4_pos       | -2.944  | 1.631 | 229.566 | 1.000 | -8.513 | 2.625 |
|             | other_neg      | 1.585   | 1.250 | 241.505 | 1.000 | -2.679 | 5.848 |
|             | other_part pos | .512    | 1.301 | 237.180 | 1.000 | -3.927 | 4.950 |
|             | other_pos      | .421    | 1.533 | 241.373 | 1.000 | -4.809 | 5.652 |
|             | PD_neg         | 2.344   | 1.367 | 243.169 | 1.000 | -2.319 | 7.007 |
|             | PD_pos         | -1.910  | 1.295 | 242.444 | 1.000 | -6.328 | 2.509 |
| PD_pos      | ASNB_neg       | 1.796   | 1.256 | 249.395 | 1.000 | -2.487 | 6.079 |
|             | ASNB_part pos  | 1.534   | 1.517 | 245.267 | 1.000 | -3.638 | 6.707 |
|             | ASNB_pos       | 4.457   | 1.530 | 241.322 | .259  | -.763  | 9.677 |
|             | Low4_neg       | 3.993   | 1.329 | 235.430 | .195  | -.543  | 8.529 |
|             | Low4_part pos  | 3.198   | 1.617 | 219.603 | 1.000 | -2.325 | 8.721 |
|             | Low4_pos       | -1.034  | 1.457 | 238.517 | 1.000 | -6.007 | 3.938 |
|             | other_neg      | 3.494   | 1.047 | 252.593 | .064  | -.075  | 7.064 |
|             | other_part pos | 2.421   | 1.081 | 250.977 | 1.000 | -1.266 | 6.108 |
|             | other_pos      | 2.331   | 1.318 | 247.957 | 1.000 | -2.165 | 6.828 |
|             | PD_neg         | 4.254*  | 1.154 | 252.915 | .018  | .319   | 8.189 |
|             | PD_part pos    | 1.910   | 1.295 | 242.444 | 1.000 | -2.509 | 6.328 |

Based on estimated marginal means

\*. The mean difference is significant at the .05 level.

a. Dependent Variable: DPDmax.

c. Adjustment for multiple comparisons: Bonferroni.



**Table S5:** Pairwise comparisons for two-way interaction model between hind limb diagnostic anaesthesia ‘efficacy’ and ‘type’ for outcome variable DPDmin, i.e. pelvic movement asymmetry associated with changes in weight-bearing between contra-lateral hind limbs.

Given are mean differences (in mm), standard error (in mm), degrees of freedom, significance achieved, upper and lower bounds of 95% confidence intervals for the pairwise difference (in mm). Pairwise significant differences at  $P < 0.05$  after Bonferroni correction are indicated with ‘\*’.

Forelimb block types: ASNB: abaxial sesamoid nerve block; DBLPN: deep branch of lateral plantar nerve block; Low6: Low6-point nerve block; MTPJ: metatarsophalangeal joint block; TMTJ: tarsometatarsal joint block; other: all other nerve/joint blocks.

Efficacy: neg: negative block (0 to 30% perceived change); part pos: partially positive block (>30 to 70% perceived change); pos: positive block (>70% change).

#### Pairwise Comparisons<sup>a</sup>

|                     |                     | Mean Difference (I-J) | Std. Error | df      | Sig. <sup>c</sup> | 95% Confidence Interval for Difference <sup>c</sup> |             |
|---------------------|---------------------|-----------------------|------------|---------|-------------------|-----------------------------------------------------|-------------|
| (I) Type x Efficacy | (J) Type x Efficacy |                       |            |         |                   | Lower Bound                                         | Upper Bound |
| ASNB_neg            | ASNB_part pos       | 2.855                 | 1.889      | 317.633 | 1.000             | -4.008                                              | 9.719       |
|                     | ASNB_pos            | -1.529                | 2.580      | 298.813 | 1.000             | -10.907                                             | 7.848       |
|                     | DBLPN_neg           | 2.674                 | 1.646      | 309.600 | 1.000             | -3.308                                              | 8.655       |
|                     | DBLPN_part pos      | 2.744                 | 1.595      | 303.912 | 1.000             | -3.053                                              | 8.541       |
|                     | DBLPN_pos           | 5.103                 | 1.444      | 293.068 | .072              | -.146                                               | 10.352      |
|                     | Low6_neg            | .191                  | 1.462      | 301.580 | 1.000             | -5.124                                              | 5.505       |
|                     | Low6_part pos       | 5.639                 | 1.649      | 290.883 | .110              | -.357                                               | 11.636      |
|                     | Low6_pos            | 5.564                 | 1.620      | 284.607 | .104              | -.329                                               | 11.458      |
|                     | MTPJ_neg            | -.289                 | 1.846      | 312.721 | 1.000             | -6.995                                              | 6.417       |
|                     | MTPJ_part pos       | 7.971*                | 1.829      | 317.722 | .003              | 1.327                                               | 14.616      |
|                     | MTPJ_pos            | 5.215                 | 1.966      | 320.402 | 1.000             | -1.927                                              | 12.357      |
|                     | other_neg           | .873                  | 1.525      | 300.577 | 1.000             | -4.670                                              | 6.416       |
|                     | other_part pos      | 4.995                 | 1.514      | 302.180 | .166              | -.509                                               | 10.500      |
|                     | other_pos           | 4.220                 | 1.790      | 319.898 | 1.000             | -2.280                                              | 10.721      |
|                     | TMTJ_neg            | 1.039                 | 1.288      | 284.668 | 1.000             | -3.644                                              | 5.723       |
|                     | TMTJ_part pos       | 1.869                 | 1.655      | 323.678 | 1.000             | -4.143                                              | 7.881       |
|                     | TMTJ_pos            | 4.157                 | 1.561      | 321.066 | 1.000             | -1.514                                              | 9.828       |

|               |                |        |       |         |       |         |        |
|---------------|----------------|--------|-------|---------|-------|---------|--------|
| ASNB_part pos | ASNB_neg       | -2.855 | 1.889 | 317.633 | 1.000 | -9.719  | 4.008  |
|               | ASNB_pos       | -4.385 | 2.755 | 313.849 | 1.000 | -14.393 | 5.623  |
|               | DBLPN_neg      | -.182  | 1.884 | 319.416 | 1.000 | -7.026  | 6.663  |
|               | DBLPN_part pos | -.111  | 1.852 | 320.934 | 1.000 | -6.839  | 6.616  |
|               | DBLPN_pos      | 2.248  | 1.736 | 323.643 | 1.000 | -4.057  | 8.552  |
|               | Low6_neg       | -2.665 | 1.738 | 322.554 | 1.000 | -8.978  | 3.649  |
|               | Low6_part pos  | 2.784  | 1.890 | 309.811 | 1.000 | -4.086  | 9.654  |
|               | Low6_pos       | 2.709  | 1.892 | 320.868 | 1.000 | -4.165  | 9.582  |
|               | MTPJ_neg       | -3.144 | 2.002 | 278.720 | 1.000 | -10.429 | 4.141  |
|               | MTPJ_part pos  | 5.116  | 2.046 | 318.886 | 1.000 | -2.318  | 12.549 |
|               | MTPJ_pos       | 2.359  | 2.164 | 322.635 | 1.000 | -5.499  | 10.218 |
|               | other_neg      | -1.983 | 1.793 | 322.203 | 1.000 | -8.497  | 4.532  |
|               | other_part pos | 2.140  | 1.756 | 305.790 | 1.000 | -4.243  | 8.523  |
|               | other_pos      | 1.365  | 2.014 | 317.357 | 1.000 | -5.953  | 8.683  |
|               | TMTJ_neg       | -1.816 | 1.608 | 323.894 | 1.000 | -7.657  | 4.024  |
|               | TMTJ_part pos  | -.987  | 1.891 | 323.992 | 1.000 | -7.854  | 5.880  |
|               | TMTJ_pos       | 1.301  | 1.786 | 323.021 | 1.000 | -5.186  | 7.789  |
| ASNB_pos      | ASNB_neg       | 1.529  | 2.580 | 298.813 | 1.000 | -7.848  | 10.907 |
|               | ASNB_part pos  | 4.385  | 2.755 | 313.849 | 1.000 | -5.623  | 14.393 |
|               | DBLPN_neg      | 4.203  | 2.596 | 310.720 | 1.000 | -5.232  | 13.638 |
|               | DBLPN_part pos | 4.273  | 2.573 | 312.043 | 1.000 | -5.075  | 13.622 |
|               | DBLPN_pos      | 6.633  | 2.483 | 310.846 | 1.000 | -2.390  | 15.655 |
|               | Low6_neg       | 1.720  | 2.486 | 310.219 | 1.000 | -7.314  | 10.754 |
|               | Low6_part pos  | 7.169  | 2.609 | 308.902 | .973  | -2.313  | 16.651 |
|               | Low6_pos       | 7.093  | 2.542 | 277.770 | .861  | -2.155  | 16.342 |
|               | MTPJ_neg       | 1.240  | 2.731 | 312.745 | 1.000 | -8.684  | 11.165 |
|               | MTPJ_part pos  | 9.501  | 2.722 | 323.759 | .084  | -.385   | 19.387 |
|               | MTPJ_pos       | 6.744  | 2.822 | 318.444 | 1.000 | -3.506  | 16.995 |
|               | other_neg      | 2.402  | 2.521 | 307.519 | 1.000 | -6.759  | 11.564 |

|                |                |        |       |         |       |         |        |
|----------------|----------------|--------|-------|---------|-------|---------|--------|
|                | other_part pos | 6.525  | 2.508 | 300.991 | 1.000 | -2.590  | 15.640 |
|                | other_pos      | 5.750  | 2.685 | 321.970 | 1.000 | -4.004  | 15.504 |
|                | TMTJ_neg       | 2.568  | 2.381 | 302.736 | 1.000 | -6.087  | 11.224 |
|                | TMTJ_part pos  | 3.398  | 2.602 | 318.538 | 1.000 | -6.055  | 12.851 |
|                | TMTJ_pos       | 5.686  | 2.540 | 320.632 | 1.000 | -3.539  | 14.911 |
| DBLPN_neg      | ASNB_neg       | -2.674 | 1.646 | 309.600 | 1.000 | -8.655  | 3.308  |
|                | ASNB_part pos  | .182   | 1.884 | 319.416 | 1.000 | -6.663  | 7.026  |
|                | ASNB_pos       | -4.203 | 2.596 | 310.720 | 1.000 | -13.638 | 5.232  |
|                | DBLPN_part pos | .070   | 1.617 | 321.737 | 1.000 | -5.804  | 5.945  |
|                | DBLPN_pos      | 2.429  | 1.471 | 321.893 | 1.000 | -2.914  | 7.773  |
|                | Low6_neg       | -2.483 | 1.437 | 280.428 | 1.000 | -7.710  | 2.744  |
|                | Low6_part pos  | 2.966  | 1.671 | 315.691 | 1.000 | -3.104  | 9.035  |
|                | Low6_pos       | 2.890  | 1.659 | 320.716 | 1.000 | -3.136  | 8.917  |
|                | MTPJ_neg       | -2.963 | 1.862 | 322.208 | 1.000 | -9.724  | 3.799  |
|                | MTPJ_part pos  | 5.298  | 1.845 | 304.450 | .669  | -1.407  | 12.003 |
|                | MTPJ_pos       | 2.541  | 1.997 | 322.052 | 1.000 | -4.713  | 9.795  |
|                | other_neg      | -1.801 | 1.545 | 321.502 | 1.000 | -7.412  | 3.810  |
|                | other_part pos | 2.322  | 1.521 | 315.474 | 1.000 | -3.205  | 7.848  |
|                | other_pos      | 1.547  | 1.779 | 319.991 | 1.000 | -4.916  | 8.009  |
|                | TMTJ_neg       | -1.635 | 1.294 | 307.659 | 1.000 | -6.338  | 3.069  |
|                | TMTJ_part pos  | -.805  | 1.664 | 322.338 | 1.000 | -6.849  | 5.238  |
|                | TMTJ_pos       | 1.483  | 1.550 | 322.872 | 1.000 | -4.147  | 7.113  |
| DBLPN_part pos | ASNB_neg       | -2.744 | 1.595 | 303.912 | 1.000 | -8.541  | 3.053  |
|                | ASNB_part pos  | .111   | 1.852 | 320.934 | 1.000 | -6.616  | 6.839  |
|                | ASNB_pos       | -4.273 | 2.573 | 312.043 | 1.000 | -13.622 | 5.075  |
|                | DBLPN_neg      | -.070  | 1.617 | 321.737 | 1.000 | -5.945  | 5.804  |
|                | DBLPN_pos      | 2.359  | 1.416 | 318.630 | 1.000 | -2.785  | 7.504  |
|                | Low6_neg       | -2.553 | 1.413 | 307.563 | 1.000 | -7.689  | 2.582  |
|                | Low6_part pos  | 2.895  | 1.594 | 285.032 | 1.000 | -2.902  | 8.692  |

|           |                |         |       |         |       |         |        |
|-----------|----------------|---------|-------|---------|-------|---------|--------|
|           | Low6_pos       | 2.820   | 1.618 | 320.039 | 1.000 | -3.059  | 8.699  |
|           | MTPJ_neg       | -3.033  | 1.795 | 313.127 | 1.000 | -9.553  | 3.487  |
|           | MTPJ_part pos  | 5.227   | 1.811 | 298.908 | .640  | -1.357  | 11.811 |
|           | MTPJ_pos       | 2.471   | 1.965 | 321.260 | 1.000 | -4.667  | 9.608  |
|           | other_neg      | -1.871  | 1.511 | 324.000 | 1.000 | -7.361  | 3.619  |
|           | other_part pos | 2.251   | 1.475 | 316.017 | 1.000 | -3.109  | 7.612  |
|           | other_pos      | 1.476   | 1.758 | 309.378 | 1.000 | -4.914  | 7.866  |
|           | TMTJ_neg       | -1.705  | 1.256 | 320.556 | 1.000 | -6.268  | 2.858  |
|           | TMTJ_part pos  | -.875   | 1.612 | 323.706 | 1.000 | -6.730  | 4.979  |
|           | TMTJ_pos       | 1.413   | 1.518 | 315.669 | 1.000 | -4.101  | 6.926  |
| DBLPN_pos | ASNB_neg       | -5.103  | 1.444 | 293.068 | .072  | -10.352 | .146   |
|           | ASNB_part pos  | -2.248  | 1.736 | 323.643 | 1.000 | -8.552  | 4.057  |
|           | ASNB_pos       | -6.633  | 2.483 | 310.846 | 1.000 | -15.655 | 2.390  |
|           | DBLPN_neg      | -2.429  | 1.471 | 321.893 | 1.000 | -7.773  | 2.914  |
|           | DBLPN_part pos | -2.359  | 1.416 | 318.630 | 1.000 | -7.504  | 2.785  |
|           | Low6_neg       | -4.912* | 1.239 | 298.677 | .014  | -9.418  | -.407  |
|           | Low6_part pos  | .536    | 1.475 | 305.174 | 1.000 | -4.826  | 5.898  |
|           | Low6_pos       | .461    | 1.464 | 315.595 | 1.000 | -4.856  | 5.778  |
|           | MTPJ_neg       | -5.392  | 1.699 | 322.900 | .252  | -11.562 | .778   |
|           | MTPJ_part pos  | 2.868   | 1.682 | 287.573 | 1.000 | -3.250  | 8.986  |
|           | MTPJ_pos       | .112    | 1.841 | 321.020 | 1.000 | -6.577  | 6.800  |
|           | other_neg      | -4.230  | 1.346 | 323.784 | .280  | -9.120  | .659   |
|           | other_part pos | -.108   | 1.336 | 323.744 | 1.000 | -4.960  | 4.745  |
|           | other_pos      | -.883   | 1.611 | 312.303 | 1.000 | -6.736  | 4.970  |
|           | TMTJ_neg       | -4.064* | 1.059 | 316.302 | .023  | -7.911  | -.217  |
|           | TMTJ_part pos  | -3.235  | 1.453 | 323.116 | 1.000 | -8.514  | 2.044  |
|           | TMTJ_pos       | -.947   | 1.367 | 298.930 | 1.000 | -5.918  | 4.025  |
| Low6_neg  | ASNB_neg       | -.191   | 1.462 | 301.580 | 1.000 | -5.505  | 5.124  |
|           | ASNB_part pos  | 2.665   | 1.738 | 322.554 | 1.000 | -3.649  | 8.978  |

|               |                |         |       |         |       |         |        |
|---------------|----------------|---------|-------|---------|-------|---------|--------|
|               | ASNB_pos       | -1.720  | 2.486 | 310.219 | 1.000 | -10.754 | 7.314  |
|               | DBLPN_neg      | 2.483   | 1.437 | 280.428 | 1.000 | -2.744  | 7.710  |
|               | DBLPN_part pos | 2.553   | 1.413 | 307.563 | 1.000 | -2.582  | 7.689  |
|               | DBLPN_pos      | 4.912*  | 1.239 | 298.677 | .014  | .407    | 9.418  |
|               | Low6_part pos  | 5.449*  | 1.496 | 313.950 | .048  | .014    | 10.883 |
|               | Low6_pos       | 5.373   | 1.485 | 322.057 | .053  | -.020   | 10.767 |
|               | MTPJ_neg       | -.480   | 1.703 | 322.271 | 1.000 | -6.666  | 5.707  |
|               | MTPJ_part pos  | 7.781*  | 1.669 | 307.640 | .001  | 1.717   | 13.844 |
|               | MTPJ_pos       | 5.024   | 1.851 | 319.966 | 1.000 | -1.701  | 11.749 |
|               | other_neg      | .682    | 1.355 | 323.430 | 1.000 | -4.241  | 5.605  |
|               | other_part pos | 4.805   | 1.343 | 322.999 | .061  | -.073   | 9.682  |
|               | other_pos      | 4.030   | 1.619 | 312.629 | 1.000 | -1.852  | 9.912  |
|               | TMTJ_neg       | .848    | 1.059 | 299.353 | 1.000 | -3.000  | 4.696  |
|               | TMTJ_part pos  | 1.678   | 1.469 | 323.976 | 1.000 | -3.657  | 7.013  |
|               | TMTJ_pos       | 3.966   | 1.358 | 318.844 | .572  | -.966   | 8.898  |
| Low6_part pos | ASNB_neg       | -5.639  | 1.649 | 290.883 | .110  | -11.636 | .357   |
|               | ASNB_part pos  | -2.784  | 1.890 | 309.811 | 1.000 | -9.654  | 4.086  |
|               | ASNB_pos       | -7.169  | 2.609 | 308.902 | .973  | -16.651 | 2.313  |
|               | DBLPN_neg      | -2.966  | 1.671 | 315.691 | 1.000 | -9.035  | 3.104  |
|               | DBLPN_part pos | -2.895  | 1.594 | 285.032 | 1.000 | -8.692  | 2.902  |
|               | DBLPN_pos      | -.536   | 1.475 | 305.174 | 1.000 | -5.898  | 4.826  |
|               | Low6_neg       | -5.449* | 1.496 | 313.950 | .048  | -10.883 | -.014  |
|               | Low6_pos       | -.075   | 1.677 | 315.810 | 1.000 | -6.168  | 6.017  |
|               | MTPJ_neg       | -5.928  | 1.851 | 307.583 | .230  | -12.655 | .798   |
|               | MTPJ_part pos  | 2.332   | 1.846 | 318.972 | 1.000 | -4.373  | 9.037  |
|               | MTPJ_pos       | -.425   | 2.003 | 323.999 | 1.000 | -7.701  | 6.852  |
|               | other_neg      | -4.767  | 1.567 | 319.314 | .388  | -10.457 | .924   |
|               | other_part pos | -.644   | 1.540 | 309.617 | 1.000 | -6.239  | 4.951  |
|               | other_pos      | -1.419  | 1.811 | 317.628 | 1.000 | -7.999  | 5.161  |

|          |                |        |       |         |       |         |        |
|----------|----------------|--------|-------|---------|-------|---------|--------|
|          | TMTJ_neg       | -4.600 | 1.330 | 310.831 | .094  | -9.432  | .231   |
|          | TMTJ_part pos  | -3.771 | 1.663 | 320.850 | 1.000 | -9.812  | 2.271  |
|          | TMTJ_pos       | -1.483 | 1.584 | 320.598 | 1.000 | -7.236  | 4.270  |
| Low6_pos | ASNB_neg       | -5.564 | 1.620 | 284.607 | .104  | -11.458 | .329   |
|          | ASNB_part pos  | -2.709 | 1.892 | 320.868 | 1.000 | -9.582  | 4.165  |
|          | ASNB_pos       | -7.093 | 2.542 | 277.770 | .861  | -16.342 | 2.155  |
|          | DBLPN_neg      | -2.890 | 1.659 | 320.716 | 1.000 | -8.917  | 3.136  |
|          | DBLPN_part pos | -2.820 | 1.618 | 320.039 | 1.000 | -8.699  | 3.059  |
|          | DBLPN_pos      | -.461  | 1.464 | 315.595 | 1.000 | -5.778  | 4.856  |
|          | Low6_neg       | -5.373 | 1.485 | 322.057 | .053  | -10.767 | .020   |
|          | Low6_part pos  | .075   | 1.677 | 315.810 | 1.000 | -6.017  | 6.168  |
|          | MTPJ_neg       | -5.853 | 1.852 | 317.269 | .264  | -12.580 | .874   |
|          | MTPJ_part pos  | 2.407  | 1.845 | 306.871 | 1.000 | -4.299  | 9.114  |
|          | MTPJ_pos       | -.349  | 1.938 | 308.277 | 1.000 | -7.394  | 6.695  |
|          | other_neg      | -4.691 | 1.549 | 321.213 | .406  | -10.317 | .934   |
|          | other_part pos | -.569  | 1.533 | 318.545 | 1.000 | -6.139  | 5.001  |
|          | other_pos      | -1.344 | 1.779 | 321.706 | 1.000 | -7.804  | 5.117  |
|          | TMTJ_neg       | -4.525 | 1.318 | 321.637 | .104  | -9.314  | .264   |
|          | TMTJ_part pos  | -3.695 | 1.660 | 323.830 | 1.000 | -9.724  | 2.333  |
|          | TMTJ_pos       | -1.407 | 1.573 | 311.935 | 1.000 | -7.124  | 4.309  |
| MTPJ_neg | ASNB_neg       | .289   | 1.846 | 312.721 | 1.000 | -6.417  | 6.995  |
|          | ASNB_part pos  | 3.144  | 2.002 | 278.720 | 1.000 | -4.141  | 10.429 |
|          | ASNB_pos       | -1.240 | 2.731 | 312.745 | 1.000 | -11.165 | 8.684  |
|          | DBLPN_neg      | 2.963  | 1.862 | 322.208 | 1.000 | -3.799  | 9.724  |
|          | DBLPN_part pos | 3.033  | 1.795 | 313.127 | 1.000 | -3.487  | 9.553  |
|          | DBLPN_pos      | 5.392  | 1.699 | 322.900 | .252  | -.778   | 11.562 |
|          | Low6_neg       | .480   | 1.703 | 322.271 | 1.000 | -5.707  | 6.666  |
|          | Low6_part pos  | 5.928  | 1.851 | 307.583 | .230  | -.798   | 12.655 |
|          | Low6_pos       | 5.853  | 1.852 | 317.269 | .264  | -.874   | 12.580 |

|               |                |         |       |         |       |         |        |
|---------------|----------------|---------|-------|---------|-------|---------|--------|
|               | MTPJ_part pos  | 8.260*  | 2.032 | 309.158 | .009  | .875    | 15.645 |
|               | MTPJ_pos       | 5.504   | 2.167 | 323.552 | 1.000 | -2.366  | 13.373 |
|               | other_neg      | 1.162   | 1.732 | 313.627 | 1.000 | -5.133  | 7.456  |
|               | other_part pos | 5.284   | 1.728 | 313.494 | .370  | -.994   | 11.563 |
|               | other_pos      | 4.509   | 1.985 | 316.047 | 1.000 | -2.703  | 11.722 |
|               | TMTJ_neg       | 1.328   | 1.557 | 322.025 | 1.000 | -4.328  | 6.985  |
|               | TMTJ_part pos  | 2.158   | 1.811 | 310.108 | 1.000 | -4.422  | 8.737  |
|               | TMTJ_pos       | 4.446   | 1.779 | 319.106 | 1.000 | -2.018  | 10.910 |
| MTPJ_part pos | ASNB_neg       | -7.971* | 1.829 | 317.722 | .003  | -14.616 | -1.327 |
|               | ASNB_part pos  | -5.116  | 2.046 | 318.886 | 1.000 | -12.549 | 2.318  |
|               | ASNB_pos       | -9.501  | 2.722 | 323.759 | .084  | -19.387 | .385   |
|               | DBLPN_neg      | -5.298  | 1.845 | 304.450 | .669  | -12.003 | 1.407  |
|               | DBLPN_part pos | -5.227  | 1.811 | 298.908 | .640  | -11.811 | 1.357  |
|               | DBLPN_pos      | -2.868  | 1.682 | 287.573 | 1.000 | -8.986  | 3.250  |
|               | Low6_neg       | -7.781* | 1.669 | 307.640 | .001  | -13.844 | -1.717 |
|               | Low6_part pos  | -2.332  | 1.846 | 318.972 | 1.000 | -9.037  | 4.373  |
|               | Low6_pos       | -2.407  | 1.845 | 306.871 | 1.000 | -9.114  | 4.299  |
|               | MTPJ_neg       | -8.260* | 2.032 | 309.158 | .009  | -15.645 | -.875  |
|               | MTPJ_pos       | -2.757  | 2.126 | 316.983 | 1.000 | -10.482 | 4.968  |
|               | other_neg      | -7.098* | 1.757 | 283.994 | .011  | -13.490 | -.707  |
|               | other_part pos | -2.976  | 1.736 | 295.433 | 1.000 | -9.288  | 3.337  |
|               | other_pos      | -3.751  | 1.970 | 269.022 | 1.000 | -10.920 | 3.419  |
|               | TMTJ_neg       | -6.932* | 1.543 | 279.664 | .002  | -12.545 | -1.319 |
|               | TMTJ_part pos  | -6.103  | 1.853 | 279.790 | .171  | -12.843 | .638   |
|               | TMTJ_pos       | -3.815  | 1.762 | 261.119 | 1.000 | -10.231 | 2.601  |
| MTPJ_pos      | ASNB_neg       | -5.215  | 1.966 | 320.402 | 1.000 | -12.357 | 1.927  |
|               | ASNB_part pos  | -2.359  | 2.164 | 322.635 | 1.000 | -10.218 | 5.499  |
|               | ASNB_pos       | -6.744  | 2.822 | 318.444 | 1.000 | -16.995 | 3.506  |
|               | DBLPN_neg      | -2.541  | 1.997 | 322.052 | 1.000 | -9.795  | 4.713  |

|           |                |        |       |         |       |         |        |
|-----------|----------------|--------|-------|---------|-------|---------|--------|
|           | DBLPN_part pos | -2.471 | 1.965 | 321.260 | 1.000 | -9.608  | 4.667  |
|           | DBLPN_pos      | -.112  | 1.841 | 321.020 | 1.000 | -6.800  | 6.577  |
|           | Low6_neg       | -5.024 | 1.851 | 319.966 | 1.000 | -11.749 | 1.701  |
|           | Low6_part pos  | .425   | 2.003 | 323.999 | 1.000 | -6.852  | 7.701  |
|           | Low6_pos       | .349   | 1.938 | 308.277 | 1.000 | -6.695  | 7.394  |
|           | MTPJ_neg       | -5.504 | 2.167 | 323.552 | 1.000 | -13.373 | 2.366  |
|           | MTPJ_part pos  | 2.757  | 2.126 | 316.983 | 1.000 | -4.968  | 10.482 |
|           | other_neg      | -4.342 | 1.896 | 322.807 | 1.000 | -11.227 | 2.543  |
|           | other_part pos | -.219  | 1.860 | 323.010 | 1.000 | -6.975  | 6.537  |
|           | other_pos      | -.994  | 2.110 | 305.709 | 1.000 | -8.664  | 6.676  |
|           | TMTJ_neg       | -4.176 | 1.730 | 314.343 | 1.000 | -10.462 | 2.111  |
|           | TMTJ_part pos  | -3.346 | 2.003 | 312.374 | 1.000 | -10.626 | 3.933  |
|           | TMTJ_pos       | -1.058 | 1.920 | 303.907 | 1.000 | -8.038  | 5.922  |
|           |                |        |       |         |       |         |        |
| other_neg | ASNB_neg       | -.873  | 1.525 | 300.577 | 1.000 | -6.416  | 4.670  |
|           | ASNB_part pos  | 1.983  | 1.793 | 322.203 | 1.000 | -4.532  | 8.497  |
|           | ASNB_pos       | -2.402 | 2.521 | 307.519 | 1.000 | -11.564 | 6.759  |
|           | DBLPN_neg      | 1.801  | 1.545 | 321.502 | 1.000 | -3.810  | 7.412  |
|           | DBLPN_part pos | 1.871  | 1.511 | 324.000 | 1.000 | -3.619  | 7.361  |
|           | DBLPN_pos      | 4.230  | 1.346 | 323.784 | .280  | -.659   | 9.120  |
|           | Low6_neg       | -.682  | 1.355 | 323.430 | 1.000 | -5.605  | 4.241  |
|           | Low6_part pos  | 4.767  | 1.567 | 319.314 | .388  | -.924   | 10.457 |
|           | Low6_pos       | 4.691  | 1.549 | 321.213 | .406  | -.934   | 10.317 |
|           | MTPJ_neg       | -1.162 | 1.732 | 313.627 | 1.000 | -7.456  | 5.133  |
|           | MTPJ_part pos  | 7.098* | 1.757 | 283.994 | .011  | .707    | 13.490 |
|           | MTPJ_pos       | 4.342  | 1.896 | 322.807 | 1.000 | -2.543  | 11.227 |
|           | other_part pos | 4.123  | 1.387 | 307.141 | .488  | -.918   | 9.163  |
|           | other_pos      | 3.348  | 1.696 | 304.125 | 1.000 | -2.815  | 9.510  |
|           | TMTJ_neg       | .166   | 1.184 | 322.294 | 1.000 | -4.132  | 4.465  |
|           | TMTJ_part pos  | .996   | 1.560 | 316.039 | 1.000 | -4.671  | 6.663  |



|                |                |        |       |         |       |         |        |
|----------------|----------------|--------|-------|---------|-------|---------|--------|
|                | TMTJ_pos       | 3.284  | 1.458 | 295.245 | 1.000 | -2.017  | 8.585  |
| other_part pos | ASNB_neg       | -4.995 | 1.514 | 302.180 | .166  | -10.500 | .509   |
|                | ASNB_part pos  | -2.140 | 1.756 | 305.790 | 1.000 | -8.523  | 4.243  |
|                | ASNB_pos       | -6.525 | 2.508 | 300.991 | 1.000 | -15.640 | 2.590  |
|                | DBLPN_neg      | -2.322 | 1.521 | 315.474 | 1.000 | -7.848  | 3.205  |
|                | DBLPN_part pos | -2.251 | 1.475 | 316.017 | 1.000 | -7.612  | 3.109  |
|                | DBLPN_pos      | .108   | 1.336 | 323.744 | 1.000 | -4.745  | 4.960  |
|                | Low6_neg       | -4.805 | 1.343 | 322.999 | .061  | -9.682  | .073   |
|                | Low6_part pos  | .644   | 1.540 | 309.617 | 1.000 | -4.951  | 6.239  |
|                | Low6_pos       | .569   | 1.533 | 318.545 | 1.000 | -5.001  | 6.139  |
|                | MTPJ_neg       | -5.284 | 1.728 | 313.494 | .370  | -11.563 | .994   |
|                | MTPJ_part pos  | 2.976  | 1.736 | 295.433 | 1.000 | -3.337  | 9.288  |
|                | MTPJ_pos       | .219   | 1.860 | 323.010 | 1.000 | -6.537  | 6.975  |
|                | other_neg      | -4.123 | 1.387 | 307.141 | .488  | -9.163  | .918   |
|                | other_pos      | -.775  | 1.661 | 320.583 | 1.000 | -6.809  | 5.259  |
|                | TMTJ_neg       | -3.956 | 1.156 | 323.103 | .107  | -8.156  | .243   |
|                | TMTJ_part pos  | -3.127 | 1.541 | 320.080 | 1.000 | -8.724  | 2.471  |
|                | TMTJ_pos       | -.839  | 1.424 | 318.444 | 1.000 | -6.012  | 4.335  |
| other_pos      | ASNB_neg       | -4.220 | 1.790 | 319.898 | 1.000 | -10.721 | 2.280  |
|                | ASNB_part pos  | -1.365 | 2.014 | 317.357 | 1.000 | -8.683  | 5.953  |
|                | ASNB_pos       | -5.750 | 2.685 | 321.970 | 1.000 | -15.504 | 4.004  |
|                | DBLPN_neg      | -1.547 | 1.779 | 319.991 | 1.000 | -8.009  | 4.916  |
|                | DBLPN_part pos | -1.476 | 1.758 | 309.378 | 1.000 | -7.866  | 4.914  |
|                | DBLPN_pos      | .883   | 1.611 | 312.303 | 1.000 | -4.970  | 6.736  |
|                | Low6_neg       | -4.030 | 1.619 | 312.629 | 1.000 | -9.912  | 1.852  |
|                | Low6_part pos  | 1.419  | 1.811 | 317.628 | 1.000 | -5.161  | 7.999  |
|                | Low6_pos       | 1.344  | 1.779 | 321.706 | 1.000 | -5.117  | 7.804  |
|                | MTPJ_neg       | -4.509 | 1.985 | 316.047 | 1.000 | -11.722 | 2.703  |
|                | MTPJ_part pos  | 3.751  | 1.970 | 269.022 | 1.000 | -3.419  | 10.920 |

|               |                |        |       |         |       |         |        |
|---------------|----------------|--------|-------|---------|-------|---------|--------|
|               | MTPJ_pos       | .994   | 2.110 | 305.709 | 1.000 | -6.676  | 8.664  |
|               | other_neg      | -3.348 | 1.696 | 304.125 | 1.000 | -9.510  | 2.815  |
|               | other_part pos | .775   | 1.661 | 320.583 | 1.000 | -5.259  | 6.809  |
|               | TMTJ_neg       | -3.181 | 1.482 | 293.300 | 1.000 | -8.572  | 2.209  |
|               | TMTJ_part pos  | -2.352 | 1.800 | 292.618 | 1.000 | -8.898  | 4.195  |
|               | TMTJ_pos       | -.064  | 1.707 | 275.570 | 1.000 | -6.275  | 6.148  |
| TMTJ_neg      | ASNB_neg       | -1.039 | 1.288 | 284.668 | 1.000 | -5.723  | 3.644  |
|               | ASNB_part pos  | 1.816  | 1.608 | 323.894 | 1.000 | -4.024  | 7.657  |
|               | ASNB_pos       | -2.568 | 2.381 | 302.736 | 1.000 | -11.224 | 6.087  |
|               | DBLPN_neg      | 1.635  | 1.294 | 307.659 | 1.000 | -3.069  | 6.338  |
|               | DBLPN_part pos | 1.705  | 1.256 | 320.556 | 1.000 | -2.858  | 6.268  |
|               | DBLPN_pos      | 4.064* | 1.059 | 316.302 | .023  | .217    | 7.911  |
|               | Low6_neg       | -.848  | 1.059 | 299.353 | 1.000 | -4.696  | 3.000  |
|               | Low6_part pos  | 4.600  | 1.330 | 310.831 | .094  | -.231   | 9.432  |
|               | Low6_pos       | 4.525  | 1.318 | 321.637 | .104  | -.264   | 9.314  |
|               | MTPJ_neg       | -1.328 | 1.557 | 322.025 | 1.000 | -6.985  | 4.328  |
|               | MTPJ_part pos  | 6.932* | 1.543 | 279.664 | .002  | 1.319   | 12.545 |
|               | MTPJ_pos       | 4.176  | 1.730 | 314.343 | 1.000 | -2.111  | 10.462 |
|               | other_neg      | -.166  | 1.184 | 322.294 | 1.000 | -4.465  | 4.132  |
|               | other_part pos | 3.956  | 1.156 | 323.103 | .107  | -.243   | 8.156  |
|               | other_pos      | 3.181  | 1.482 | 293.300 | 1.000 | -2.209  | 8.572  |
|               | TMTJ_part pos  | .829   | 1.319 | 317.785 | 1.000 | -3.963  | 5.622  |
|               | TMTJ_pos       | 3.118  | 1.203 | 274.282 | 1.000 | -1.261  | 7.496  |
| TMTJ_part pos | ASNB_neg       | -1.869 | 1.655 | 323.678 | 1.000 | -7.881  | 4.143  |
|               | ASNB_part pos  | .987   | 1.891 | 323.992 | 1.000 | -5.880  | 7.854  |
|               | ASNB_pos       | -3.398 | 2.602 | 318.538 | 1.000 | -12.851 | 6.055  |
|               | DBLPN_neg      | .805   | 1.664 | 322.338 | 1.000 | -5.238  | 6.849  |
|               | DBLPN_part pos | .875   | 1.612 | 323.706 | 1.000 | -4.979  | 6.730  |
|               | DBLPN_pos      | 3.235  | 1.453 | 323.116 | 1.000 | -2.044  | 8.514  |

|          |                |        |       |         |       |         |        |
|----------|----------------|--------|-------|---------|-------|---------|--------|
|          | Low6_neg       | -1.678 | 1.469 | 323.976 | 1.000 | -7.013  | 3.657  |
|          | Low6_part pos  | 3.771  | 1.663 | 320.850 | 1.000 | -2.271  | 9.812  |
|          | Low6_pos       | 3.695  | 1.660 | 323.830 | 1.000 | -2.333  | 9.724  |
|          | MTPJ_neg       | -2.158 | 1.811 | 310.108 | 1.000 | -8.737  | 4.422  |
|          | MTPJ_part pos  | 6.103  | 1.853 | 279.790 | .171  | -.638   | 12.843 |
|          | MTPJ_pos       | 3.346  | 2.003 | 312.374 | 1.000 | -3.933  | 10.626 |
|          | other_neg      | -.996  | 1.560 | 316.039 | 1.000 | -6.663  | 4.671  |
|          | other_part pos | 3.127  | 1.541 | 320.080 | 1.000 | -2.471  | 8.724  |
|          | other_pos      | 2.352  | 1.800 | 292.618 | 1.000 | -4.195  | 8.898  |
|          | TMTJ_neg       | -.829  | 1.319 | 317.785 | 1.000 | -5.622  | 3.963  |
|          | TMTJ_pos       | 2.288  | 1.572 | 288.229 | 1.000 | -3.428  | 8.004  |
| TMTJ_pos | ASNB_neg       | -4.157 | 1.561 | 321.066 | 1.000 | -9.828  | 1.514  |
|          | ASNB_part pos  | -1.301 | 1.786 | 323.021 | 1.000 | -7.789  | 5.186  |
|          | ASNB_pos       | -5.686 | 2.540 | 320.632 | 1.000 | -14.911 | 3.539  |
|          | DBLPN_neg      | -1.483 | 1.550 | 322.872 | 1.000 | -7.113  | 4.147  |
|          | DBLPN_part pos | -1.413 | 1.518 | 315.669 | 1.000 | -6.926  | 4.101  |
|          | DBLPN_pos      | .947   | 1.367 | 298.930 | 1.000 | -4.025  | 5.918  |
|          | Low6_neg       | -3.966 | 1.358 | 318.844 | .572  | -8.898  | .966   |
|          | Low6_part pos  | 1.483  | 1.584 | 320.598 | 1.000 | -4.270  | 7.236  |
|          | Low6_pos       | 1.407  | 1.573 | 311.935 | 1.000 | -4.309  | 7.124  |
|          | MTPJ_neg       | -4.446 | 1.779 | 319.106 | 1.000 | -10.910 | 2.018  |
|          | MTPJ_part pos  | 3.815  | 1.762 | 261.119 | 1.000 | -2.601  | 10.231 |
|          | MTPJ_pos       | 1.058  | 1.920 | 303.907 | 1.000 | -5.922  | 8.038  |
|          | other_neg      | -3.284 | 1.458 | 295.245 | 1.000 | -8.585  | 2.017  |
|          | other_part pos | .839   | 1.424 | 318.444 | 1.000 | -4.335  | 6.012  |
|          | other_pos      | .064   | 1.707 | 275.570 | 1.000 | -6.148  | 6.275  |
|          | TMTJ_neg       | -3.118 | 1.203 | 274.282 | 1.000 | -7.496  | 1.261  |
|          | TMTJ_part pos  | -2.288 | 1.572 | 288.229 | 1.000 | -8.004  | 3.428  |

Based on estimated marginal means

\*. The mean difference is significant at the .05 level.

a. Dependent Variable: DPDmin.

c. Adjustment for multiple comparisons: Bonferroni.

**Table S6:** Pairwise comparisons for two-way interaction model between hind limb diagnostic anaesthesia ‘efficacy’ and ‘type’ for outcome variable DPDup, i.e. pelvic movement asymmetry associated with changes in upward movement amplitudes between stride halves.

Given are mean differences (in mm), standard error (in mm), degrees of freedom, significance achieved, upper and lower bounds of 95% confidence intervals for the pairwise difference (in mm). Pairwise significant differences at  $P < 0.05$  after Bonferroni correction are indicated with ‘\*’.

Forelimb block types: ASNB: abaxial sesamoid nerve block; DBLPN: deep branch of lateral plantar nerve block; Low6: Low6-point nerve block; MTPJ: metatarsophalangeal joint block; TMTJ: tarsometatarsal joint block; other: all other nerve/joint blocks.

Efficacy: neg: negative block (0 to 30% perceived change); part pos: partially positive block (>30 to 70% perceived change); pos: positive block (>70% change).

#### Pairwise Comparisons<sup>a</sup>

| (I) Type x Efficacy (J) Type x Efficacy |                | Mean Difference (I-J) | Std. Error | df      | Sig. <sup>c</sup> | 95% Confidence Interval for Difference <sup>c</sup> |             |
|-----------------------------------------|----------------|-----------------------|------------|---------|-------------------|-----------------------------------------------------|-------------|
|                                         |                |                       |            |         |                   | Lower Bound                                         | Upper Bound |
| ASNB_neg                                | ASNB_part pos  | 6.968                 | 2.910      | 323.957 | 1.000             | -3.603                                              | 17.539      |
|                                         | ASNB_pos       | .977                  | 3.997      | 317.630 | 1.000             | -13.545                                             | 15.499      |
|                                         | DBLPN_neg      | 4.068                 | 2.543      | 322.426 | 1.000             | -5.169                                              | 13.304      |
|                                         | DBLPN_part pos | 7.405                 | 2.468      | 320.858 | .444              | -1.559                                              | 16.369      |
|                                         | DBLPN_pos      | 8.837*                | 2.240      | 315.620 | .015              | .700                                                | 16.974      |
|                                         | Low6_neg       | .559                  | 2.263      | 320.067 | 1.000             | -7.662                                              | 8.781       |
|                                         | Low6_part pos  | 9.438*                | 2.561      | 312.436 | .041              | .133                                                | 18.743      |
|                                         | Low6_pos       | 9.983*                | 2.519      | 310.813 | .014              | .830                                                | 19.135      |
|                                         | MTPJ_neg       | -1.768                | 2.845      | 323.950 | 1.000             | -12.100                                             | 8.564       |
|                                         | MTPJ_part pos  | 11.805*               | 2.789      | 312.596 | .005              | 1.671                                               | 21.939      |
|                                         | MTPJ_pos       | 6.986                 | 3.024      | 323.597 | 1.000             | -3.996                                              | 17.968      |
|                                         | other_neg      | .568                  | 2.361      | 320.320 | 1.000             | -8.007                                              | 9.143       |
|                                         | other_part pos | 9.764*                | 2.343      | 321.708 | .006              | 1.254                                               | 18.273      |
|                                         | other_pos      | 9.741                 | 2.731      | 313.393 | .064              | -.181                                               | 19.664      |
|                                         | TMTJ_neg       | .181                  | 2.001      | 313.602 | 1.000             | -7.088                                              | 7.449       |
|                                         | TMTJ_part pos  | 1.014                 | 2.538      | 320.424 | 1.000             | -8.204                                              | 10.233      |
|                                         | TMTJ_pos       | 7.111                 | 2.387      | 319.224 | .476              | -1.559                                              | 15.781      |
| ASNB_part pos                           | ASNB_neg       | -6.968                | 2.910      | 323.957 | 1.000             | -17.539                                             | 3.603       |

|          |                |        |       |         |       |         |        |
|----------|----------------|--------|-------|---------|-------|---------|--------|
|          | ASNB_pos       | -5.991 | 4.251 | 322.831 | 1.000 | -21.432 | 9.451  |
|          | DBLPN_neg      | -2.900 | 2.902 | 323.810 | 1.000 | -13.442 | 7.641  |
|          | DBLPN_part pos | .437   | 2.849 | 323.974 | 1.000 | -9.912  | 10.786 |
|          | DBLPN_pos      | 1.869  | 2.665 | 323.281 | 1.000 | -7.810  | 11.548 |
|          | Low6_neg       | -6.408 | 2.672 | 323.892 | 1.000 | -16.114 | 3.297  |
|          | Low6_part pos  | 2.470  | 2.923 | 320.332 | 1.000 | -8.148  | 13.088 |
|          | Low6_pos       | 3.015  | 2.911 | 323.973 | 1.000 | -7.559  | 13.589 |
|          | MTPJ_neg       | -8.735 | 3.116 | 309.217 | .822  | -20.057 | 2.586  |
|          | MTPJ_part pos  | 4.837  | 3.123 | 314.565 | 1.000 | -6.508  | 16.182 |
|          | MTPJ_pos       | .018   | 3.324 | 323.605 | 1.000 | -12.056 | 12.093 |
|          | other_neg      | -6.400 | 2.757 | 323.795 | 1.000 | -16.413 | 3.614  |
|          | other_part pos | 2.796  | 2.717 | 320.610 | 1.000 | -7.074  | 12.665 |
|          | other_pos      | 2.774  | 3.072 | 313.038 | 1.000 | -8.387  | 13.934 |
|          | TMTJ_neg       | -6.787 | 2.467 | 322.534 | .959  | -15.747 | 2.173  |
|          | TMTJ_part pos  | -5.953 | 2.897 | 320.750 | 1.000 | -16.476 | 4.569  |
|          | TMTJ_pos       | .143   | 2.746 | 324.000 | 1.000 | -9.832  | 10.118 |
| ASNB_pos | ASNB_neg       | -.977  | 3.997 | 317.630 | 1.000 | -15.499 | 13.545 |
|          | ASNB_part pos  | 5.991  | 4.251 | 322.831 | 1.000 | -9.451  | 21.432 |
|          | DBLPN_neg      | 3.090  | 4.012 | 321.844 | 1.000 | -11.481 | 17.662 |
|          | DBLPN_part pos | 6.428  | 3.973 | 322.584 | 1.000 | -8.003  | 20.859 |
|          | DBLPN_pos      | 7.860  | 3.836 | 321.930 | 1.000 | -6.074  | 21.794 |
|          | Low6_neg       | -.418  | 3.842 | 321.509 | 1.000 | -14.373 | 13.538 |
|          | Low6_part pos  | 8.461  | 4.034 | 320.975 | 1.000 | -6.192  | 23.114 |
|          | Low6_pos       | 9.006  | 3.959 | 302.950 | 1.000 | -5.386  | 23.397 |
|          | MTPJ_neg       | -2.745 | 4.214 | 323.653 | 1.000 | -18.051 | 12.561 |
|          | MTPJ_part pos  | 10.828 | 4.177 | 323.107 | 1.000 | -4.345  | 26.001 |
|          | MTPJ_pos       | 6.009  | 4.345 | 323.998 | 1.000 | -9.772  | 21.790 |
|          | other_neg      | -.409  | 3.898 | 320.985 | 1.000 | -14.568 | 13.751 |
|          | other_part pos | 8.787  | 3.883 | 319.522 | 1.000 | -5.318  | 22.891 |

|                |                |        |       |         |       |         |        |
|----------------|----------------|--------|-------|---------|-------|---------|--------|
|                | other_pos      | 8.764  | 4.129 | 323.923 | 1.000 | -6.234  | 23.762 |
|                | TMTJ_neg       | -.796  | 3.687 | 318.591 | 1.000 | -14.192 | 12.599 |
|                | TMTJ_part pos  | .037   | 4.008 | 323.952 | 1.000 | -14.520 | 14.594 |
|                | TMTJ_pos       | 6.134  | 3.911 | 323.815 | 1.000 | -8.070  | 20.338 |
| DBLPN_neg      | ASNB_neg       | -4.068 | 2.543 | 322.426 | 1.000 | -13.304 | 5.169  |
|                | ASNB_part pos  | 2.900  | 2.902 | 323.810 | 1.000 | -7.641  | 13.442 |
|                | ASNB_pos       | -3.090 | 4.012 | 321.844 | 1.000 | -17.662 | 11.481 |
|                | DBLPN_part pos | 3.337  | 2.487 | 323.760 | 1.000 | -5.694  | 12.369 |
|                | DBLPN_pos      | 4.769  | 2.262 | 323.951 | 1.000 | -3.447  | 12.986 |
|                | Low6_neg       | -3.508 | 2.237 | 304.634 | 1.000 | -11.638 | 4.621  |
|                | Low6_part pos  | 5.370  | 2.578 | 322.347 | 1.000 | -3.995  | 14.735 |
|                | Low6_pos       | 5.915  | 2.553 | 323.991 | 1.000 | -3.357  | 15.187 |
|                | MTPJ_neg       | -5.835 | 2.858 | 321.361 | 1.000 | -16.215 | 4.544  |
|                | MTPJ_part pos  | 7.737  | 2.802 | 301.940 | .934  | -2.447  | 17.921 |
|                | MTPJ_pos       | 2.918  | 3.050 | 314.197 | 1.000 | -8.164  | 14.001 |
|                | other_neg      | -3.499 | 2.376 | 323.877 | 1.000 | -12.127 | 5.129  |
|                | other_part pos | 5.696  | 2.346 | 323.612 | 1.000 | -2.824  | 14.216 |
|                | other_pos      | 5.674  | 2.717 | 317.231 | 1.000 | -4.198  | 15.545 |
|                | TMTJ_neg       | -3.887 | 2.002 | 319.497 | 1.000 | -11.160 | 3.387  |
|                | TMTJ_part pos  | -3.053 | 2.542 | 315.860 | 1.000 | -12.290 | 6.184  |
|                | TMTJ_pos       | 3.043  | 2.374 | 322.503 | 1.000 | -5.580  | 11.667 |
| DBLPN_part pos | ASNB_neg       | -7.405 | 2.468 | 320.858 | .444  | -16.369 | 1.559  |
|                | ASNB_part pos  | -.437  | 2.849 | 323.974 | 1.000 | -10.786 | 9.912  |
|                | ASNB_pos       | -6.428 | 3.973 | 322.584 | 1.000 | -20.859 | 8.003  |
|                | DBLPN_neg      | -3.337 | 2.487 | 323.760 | 1.000 | -12.369 | 5.694  |
|                | DBLPN_pos      | 1.432  | 2.181 | 323.965 | 1.000 | -6.490  | 9.354  |
|                | Low6_neg       | -6.846 | 2.185 | 321.280 | .289  | -14.783 | 1.091  |
|                | Low6_part pos  | 2.033  | 2.480 | 305.901 | 1.000 | -6.979  | 11.044 |
|                | Low6_pos       | 2.578  | 2.490 | 323.786 | 1.000 | -6.466  | 11.621 |

|           |                |          |       |         |       |         |        |
|-----------|----------------|----------|-------|---------|-------|---------|--------|
|           | MTPJ_neg       | -9.173   | 2.768 | 323.893 | .156  | -19.225 | .879   |
|           | MTPJ_part pos  | 4.400    | 2.746 | 294.779 | 1.000 | -5.584  | 14.383 |
|           | MTPJ_pos       | -.419    | 2.999 | 310.919 | 1.000 | -11.315 | 10.477 |
|           | other_neg      | -6.837   | 2.316 | 320.070 | .518  | -15.248 | 1.575  |
|           | other_part pos | 2.359    | 2.274 | 323.948 | 1.000 | -5.900  | 10.617 |
|           | other_pos      | 2.336    | 2.674 | 303.983 | 1.000 | -7.381  | 12.053 |
|           | TMTJ_neg       | -7.224*  | 1.933 | 323.946 | .034  | -14.244 | -.205  |
|           | TMTJ_part pos  | -6.391   | 2.467 | 318.072 | 1.000 | -15.351 | 2.570  |
|           | TMTJ_pos       | -.294    | 2.315 | 315.361 | 1.000 | -8.703  | 8.115  |
| DBLPN_pos | ASNB_neg       | -8.837*  | 2.240 | 315.620 | .015  | -16.974 | -.700  |
|           | ASNB_part pos  | -1.869   | 2.665 | 323.281 | 1.000 | -11.548 | 7.810  |
|           | ASNB_pos       | -7.860   | 3.836 | 321.930 | 1.000 | -21.794 | 6.074  |
|           | DBLPN_neg      | -4.769   | 2.262 | 323.951 | 1.000 | -12.986 | 3.447  |
|           | DBLPN_part pos | -1.432   | 2.181 | 323.965 | 1.000 | -9.354  | 6.490  |
|           | Low6_neg       | -8.278*  | 1.922 | 314.806 | .003  | -15.260 | -1.295 |
|           | Low6_part pos  | .601     | 2.285 | 317.415 | 1.000 | -7.699  | 8.901  |
|           | Low6_pos       | 1.146    | 2.257 | 323.519 | 1.000 | -7.052  | 9.344  |
|           | MTPJ_neg       | -10.605* | 2.605 | 319.207 | .009  | -20.067 | -1.142 |
|           | MTPJ_part pos  | 2.968    | 2.545 | 288.224 | 1.000 | -6.286  | 12.222 |
|           | MTPJ_pos       | -1.851   | 2.810 | 311.913 | 1.000 | -12.062 | 8.360  |
|           | other_neg      | -8.269*  | 2.065 | 322.583 | .012  | -15.771 | -.766  |
|           | other_part pos | .927     | 2.048 | 320.892 | 1.000 | -6.514  | 8.367  |
|           | other_pos      | .904     | 2.453 | 310.265 | 1.000 | -8.008  | 9.817  |
|           | TMTJ_neg       | -8.656*  | 1.633 | 323.256 | .000  | -14.587 | -2.725 |
|           | TMTJ_part pos  | -7.822   | 2.231 | 322.566 | .079  | -15.926 | .281   |
|           | TMTJ_pos       | -1.726   | 2.077 | 307.979 | 1.000 | -9.275  | 5.824  |
| Low6_neg  | ASNB_neg       | -.559    | 2.263 | 320.067 | 1.000 | -8.781  | 7.662  |
|           | ASNB_part pos  | 6.408    | 2.672 | 323.892 | 1.000 | -3.297  | 16.114 |
|           | ASNB_pos       | .418     | 3.842 | 321.509 | 1.000 | -13.538 | 14.373 |



|               |                |          |       |         |       |         |        |
|---------------|----------------|----------|-------|---------|-------|---------|--------|
|               | DBLPN_neg      | 3.508    | 2.237 | 304.634 | 1.000 | -4.621  | 11.638 |
|               | DBLPN_part pos | 6.846    | 2.185 | 321.280 | .289  | -1.091  | 14.783 |
|               | DBLPN_pos      | 8.278*   | 1.922 | 314.806 | .003  | 1.295   | 15.260 |
|               | Low6_part pos  | 8.879*   | 2.310 | 321.968 | .022  | .489    | 17.268 |
|               | Low6_pos       | 9.423*   | 2.282 | 323.683 | .007  | 1.134   | 17.713 |
|               | MTPJ_neg       | -2.327   | 2.614 | 320.570 | 1.000 | -11.821 | 7.166  |
|               | MTPJ_part pos  | 11.246*  | 2.537 | 306.860 | .002  | 2.025   | 20.466 |
|               | MTPJ_pos       | 6.427    | 2.824 | 310.698 | 1.000 | -3.834  | 16.687 |
|               | other_neg      | .009     | 2.081 | 323.000 | 1.000 | -7.549  | 7.566  |
|               | other_part pos | 9.204*   | 2.061 | 322.226 | .002  | 1.717   | 16.691 |
|               | other_pos      | 9.182*   | 2.465 | 310.955 | .036  | .223    | 18.140 |
|               | TMTJ_neg       | -.379    | 1.641 | 315.998 | 1.000 | -6.340  | 5.583  |
|               | TMTJ_part pos  | .455     | 2.251 | 320.833 | 1.000 | -7.722  | 8.632  |
|               | TMTJ_pos       | 6.552    | 2.076 | 321.152 | .267  | -.988   | 14.091 |
| Low6_part pos | ASNB_neg       | -9.438*  | 2.561 | 312.436 | .041  | -18.743 | -.133  |
|               | ASNB_part pos  | -2.470   | 2.923 | 320.332 | 1.000 | -13.088 | 8.148  |
|               | ASNB_pos       | -8.461   | 4.034 | 320.975 | 1.000 | -23.114 | 6.192  |
|               | DBLPN_neg      | -5.370   | 2.578 | 322.347 | 1.000 | -14.735 | 3.995  |
|               | DBLPN_part pos | -2.033   | 2.480 | 305.901 | 1.000 | -11.044 | 6.979  |
|               | DBLPN_pos      | -.601    | 2.285 | 317.415 | 1.000 | -8.901  | 7.699  |
|               | Low6_neg       | -8.879*  | 2.310 | 321.968 | .022  | -17.268 | -.489  |
|               | Low6_pos       | .545     | 2.587 | 323.308 | 1.000 | -8.850  | 9.939  |
|               | MTPJ_neg       | -11.206* | 2.860 | 322.625 | .017  | -21.594 | -.817  |
|               | MTPJ_part pos  | 2.367    | 2.818 | 316.645 | 1.000 | -7.870  | 12.604 |
|               | MTPJ_pos       | -2.452   | 3.070 | 320.664 | 1.000 | -13.604 | 8.700  |
|               | other_neg      | -8.870*  | 2.413 | 323.838 | .042  | -17.634 | -.105  |
|               | other_part pos | .326     | 2.380 | 321.227 | 1.000 | -8.319  | 8.971  |
|               | other_pos      | .303     | 2.763 | 314.796 | 1.000 | -9.737  | 10.343 |
|               | TMTJ_neg       | -9.257*  | 2.056 | 320.162 | .001  | -16.725 | -1.790 |

|          |                |          |       |         |       |         |        |
|----------|----------------|----------|-------|---------|-------|---------|--------|
|          | TMTJ_part pos  | -8.423   | 2.559 | 323.966 | .169  | -17.718 | .871   |
|          | TMTJ_pos       | -2.327   | 2.423 | 321.342 | 1.000 | -11.126 | 6.473  |
| Low6_pos | ASNB_neg       | -9.983*  | 2.519 | 310.813 | .014  | -19.135 | -.830  |
|          | ASNB_part pos  | -3.015   | 2.911 | 323.973 | 1.000 | -13.589 | 7.559  |
|          | ASNB_pos       | -9.006   | 3.959 | 302.950 | 1.000 | -23.397 | 5.386  |
|          | DBLPN_neg      | -5.915   | 2.553 | 323.991 | 1.000 | -15.187 | 3.357  |
|          | DBLPN_part pos | -2.578   | 2.490 | 323.786 | 1.000 | -11.621 | 6.466  |
|          | DBLPN_pos      | -1.146   | 2.257 | 323.519 | 1.000 | -9.344  | 7.052  |
|          | Low6_neg       | -9.423*  | 2.282 | 323.683 | .007  | -17.713 | -1.134 |
|          | Low6_part pos  | -.545    | 2.587 | 323.308 | 1.000 | -9.939  | 8.850  |
|          | MTPJ_neg       | -11.750* | 2.850 | 323.489 | .007  | -22.100 | -1.400 |
|          | MTPJ_part pos  | 1.822    | 2.804 | 302.045 | 1.000 | -8.368  | 12.013 |
|          | MTPJ_pos       | -2.997   | 2.996 | 321.928 | 1.000 | -13.879 | 7.886  |
|          | other_neg      | -9.414*  | 2.381 | 323.587 | .014  | -18.063 | -.766  |
|          | other_part pos | -.219    | 2.360 | 323.789 | 1.000 | -8.789  | 8.351  |
|          | other_pos      | -.241    | 2.719 | 317.912 | 1.000 | -10.118 | 9.635  |
|          | TMTJ_neg       | -9.802*  | 2.027 | 323.634 | .000  | -17.163 | -2.441 |
|          | TMTJ_part pos  | -8.968   | 2.540 | 318.355 | .073  | -18.196 | .260   |
|          | TMTJ_pos       | -2.872   | 2.396 | 312.208 | 1.000 | -11.579 | 5.835  |
| MTPJ_neg | ASNB_neg       | 1.768    | 2.845 | 323.950 | 1.000 | -8.564  | 12.100 |
|          | ASNB_part pos  | 8.735    | 3.116 | 309.217 | .822  | -2.586  | 20.057 |
|          | ASNB_pos       | 2.745    | 4.214 | 323.653 | 1.000 | -12.561 | 18.051 |
|          | DBLPN_neg      | 5.835    | 2.858 | 321.361 | 1.000 | -4.544  | 16.215 |
|          | DBLPN_part pos | 9.173    | 2.768 | 323.893 | .156  | -.879   | 19.225 |
|          | DBLPN_pos      | 10.605*  | 2.605 | 319.207 | .009  | 1.142   | 20.067 |
|          | Low6_neg       | 2.327    | 2.614 | 320.570 | 1.000 | -7.166  | 11.821 |
|          | Low6_part pos  | 11.206*  | 2.860 | 322.625 | .017  | .817    | 21.594 |
|          | Low6_pos       | 11.750*  | 2.850 | 323.489 | .007  | 1.400   | 22.100 |
|          | MTPJ_part pos  | 13.573*  | 3.086 | 295.607 | .002  | 2.353   | 24.792 |

|               |                |          |       |         |       |         |        |
|---------------|----------------|----------|-------|---------|-------|---------|--------|
|               | MTPJ_pos       | 8.754    | 3.310 | 311.353 | 1.000 | -3.274  | 20.782 |
|               | other_neg      | 2.336    | 2.671 | 323.931 | 1.000 | -7.366  | 12.038 |
|               | other_part pos | 11.531*  | 2.663 | 323.899 | .003  | 1.860   | 21.203 |
|               | other_pos      | 11.509*  | 3.022 | 302.996 | .026  | .526    | 22.492 |
|               | TMTJ_neg       | 1.948    | 2.390 | 320.278 | 1.000 | -6.732  | 10.629 |
|               | TMTJ_part pos  | 2.782    | 2.795 | 323.525 | 1.000 | -7.371  | 12.935 |
|               | TMTJ_pos       | 8.879    | 2.713 | 309.334 | .181  | -.980   | 18.737 |
| MTPJ_part pos | ASNB_neg       | -11.805* | 2.789 | 312.596 | .005  | -21.939 | -1.671 |
|               | ASNB_part pos  | -4.837   | 3.123 | 314.565 | 1.000 | -16.182 | 6.508  |
|               | ASNB_pos       | -10.828  | 4.177 | 323.107 | 1.000 | -26.001 | 4.345  |
|               | DBLPN_neg      | -7.737   | 2.802 | 301.940 | .934  | -17.921 | 2.447  |
|               | DBLPN_part pos | -4.400   | 2.746 | 294.779 | 1.000 | -14.383 | 5.584  |
|               | DBLPN_pos      | -2.968   | 2.545 | 288.224 | 1.000 | -12.222 | 6.286  |
|               | Low6_neg       | -11.246* | 2.537 | 306.860 | .002  | -20.466 | -2.025 |
|               | Low6_part pos  | -2.367   | 2.818 | 316.645 | 1.000 | -12.604 | 7.870  |
|               | Low6_pos       | -1.822   | 2.804 | 302.045 | 1.000 | -12.013 | 8.368  |
|               | MTPJ_neg       | -13.573* | 3.086 | 295.607 | .002  | -24.792 | -2.353 |
|               | MTPJ_pos       | -4.819   | 3.239 | 307.229 | 1.000 | -16.590 | 6.952  |
|               | other_neg      | -11.237* | 2.655 | 282.299 | .005  | -20.896 | -1.577 |
|               | other_part pos | -2.041   | 2.629 | 289.762 | 1.000 | -11.603 | 7.521  |
|               | other_pos      | -2.064   | 2.969 | 273.609 | 1.000 | -12.868 | 8.740  |
|               | TMTJ_neg       | -11.624* | 2.330 | 280.823 | .000  | -20.100 | -3.148 |
|               | TMTJ_part pos  | -10.790* | 2.796 | 276.668 | .022  | -20.966 | -.615  |
|               | TMTJ_pos       | -4.694   | 2.654 | 274.810 | 1.000 | -14.352 | 4.964  |
| MTPJ_pos      | ASNB_neg       | -6.986   | 3.024 | 323.597 | 1.000 | -17.968 | 3.996  |
|               | ASNB_part pos  | -.018    | 3.324 | 323.605 | 1.000 | -12.093 | 12.056 |
|               | ASNB_pos       | -6.009   | 4.345 | 323.998 | 1.000 | -21.790 | 9.772  |
|               | DBLPN_neg      | -2.918   | 3.050 | 314.197 | 1.000 | -14.001 | 8.164  |
|               | DBLPN_part pos | .419     | 2.999 | 310.919 | 1.000 | -10.477 | 11.315 |

|           |                |         |       |         |       |         |        |
|-----------|----------------|---------|-------|---------|-------|---------|--------|
|           | DBLPN_pos      | 1.851   | 2.810 | 311.913 | 1.000 | -8.360  | 12.062 |
|           | Low6_neg       | -6.427  | 2.824 | 310.698 | 1.000 | -16.687 | 3.834  |
|           | Low6_part pos  | 2.452   | 3.070 | 320.664 | 1.000 | -8.700  | 13.604 |
|           | Low6_pos       | 2.997   | 2.996 | 321.928 | 1.000 | -7.886  | 13.879 |
|           | MTPJ_neg       | -8.754  | 3.310 | 311.353 | 1.000 | -20.782 | 3.274  |
|           | MTPJ_part pos  | 4.819   | 3.239 | 307.229 | 1.000 | -6.952  | 16.590 |
|           | other_neg      | -6.418  | 2.897 | 314.864 | 1.000 | -16.941 | 4.106  |
|           | other_part pos | 2.778   | 2.856 | 322.610 | 1.000 | -7.594  | 13.150 |
|           | other_pos      | 2.755   | 3.203 | 295.757 | 1.000 | -8.890  | 14.401 |
|           | TMTJ_neg       | -6.805  | 2.632 | 300.384 | 1.000 | -16.371 | 2.761  |
|           | TMTJ_part pos  | -5.972  | 3.045 | 298.465 | 1.000 | -17.041 | 5.098  |
|           | TMTJ_pos       | .125    | 2.915 | 298.589 | 1.000 | -10.472 | 10.722 |
|           |                |         |       |         |       |         |        |
| other_neg | ASNB_neg       | -.568   | 2.361 | 320.320 | 1.000 | -9.143  | 8.007  |
|           | ASNB_part pos  | 6.400   | 2.757 | 323.795 | 1.000 | -3.614  | 16.413 |
|           | ASNB_pos       | .409    | 3.898 | 320.985 | 1.000 | -13.751 | 14.568 |
|           | DBLPN_neg      | 3.499   | 2.376 | 323.877 | 1.000 | -5.129  | 12.127 |
|           | DBLPN_part pos | 6.837   | 2.316 | 320.070 | .518  | -1.575  | 15.248 |
|           | DBLPN_pos      | 8.269*  | 2.065 | 322.583 | .012  | .766    | 15.771 |
|           | Low6_neg       | -.009   | 2.081 | 323.000 | 1.000 | -7.566  | 7.549  |
|           | Low6_part pos  | 8.870*  | 2.413 | 323.838 | .042  | .105    | 17.634 |
|           | Low6_pos       | 9.414*  | 2.381 | 323.587 | .014  | .766    | 18.063 |
|           | MTPJ_neg       | -2.336  | 2.671 | 323.931 | 1.000 | -12.038 | 7.366  |
|           | MTPJ_part pos  | 11.237* | 2.655 | 282.299 | .005  | 1.577   | 20.896 |
|           | MTPJ_pos       | 6.418   | 2.897 | 314.864 | 1.000 | -4.106  | 16.941 |
|           | other_part pos | 9.195*  | 2.144 | 321.837 | .004  | 1.408   | 16.983 |
|           | other_pos      | 9.173   | 2.574 | 299.228 | .065  | -.184   | 18.531 |
|           | TMTJ_neg       | -.387   | 1.808 | 315.581 | 1.000 | -6.957  | 6.182  |
|           | TMTJ_part pos  | .446    | 2.375 | 304.828 | 1.000 | -8.184  | 9.077  |
|           | TMTJ_pos       | 6.543   | 2.211 | 300.047 | .510  | -1.495  | 14.581 |

|                |                |          |       |         |       |         |        |
|----------------|----------------|----------|-------|---------|-------|---------|--------|
| other_part pos | ASNB_neg       | -9.764*  | 2.343 | 321.708 | .006  | -18.273 | -1.254 |
|                | ASNB_part pos  | -2.796   | 2.717 | 320.610 | 1.000 | -12.665 | 7.074  |
|                | ASNB_pos       | -8.787   | 3.883 | 319.522 | 1.000 | -22.891 | 5.318  |
|                | DBLPN_neg      | -5.696   | 2.346 | 323.612 | 1.000 | -14.216 | 2.824  |
|                | DBLPN_part pos | -2.359   | 2.274 | 323.948 | 1.000 | -10.617 | 5.900  |
|                | DBLPN_pos      | -.927    | 2.048 | 320.892 | 1.000 | -8.367  | 6.514  |
|                | Low6_neg       | -9.204*  | 2.061 | 322.226 | .002  | -16.691 | -1.717 |
|                | Low6_part pos  | -.326    | 2.380 | 321.227 | 1.000 | -8.971  | 8.319  |
|                | Low6_pos       | .219     | 2.360 | 323.789 | 1.000 | -8.351  | 8.789  |
|                | MTPJ_neg       | -11.531* | 2.663 | 323.899 | .003  | -21.203 | -1.860 |
|                | MTPJ_part pos  | 2.041    | 2.629 | 289.762 | 1.000 | -7.521  | 11.603 |
|                | MTPJ_pos       | -2.778   | 2.856 | 322.610 | 1.000 | -13.150 | 7.594  |
|                | other_neg      | -9.195*  | 2.144 | 321.837 | .004  | -16.983 | -1.408 |
|                | other_pos      | -.022    | 2.536 | 314.348 | 1.000 | -9.237  | 9.192  |
|                | TMTJ_neg       | -9.583*  | 1.774 | 321.216 | .000  | -16.026 | -3.140 |
|                | TMTJ_part pos  | -8.749*  | 2.349 | 308.286 | .036  | -17.286 | -.212  |
|                | TMTJ_pos       | -2.653   | 2.173 | 315.509 | 1.000 | -10.549 | 5.244  |
| other_pos      | ASNB_neg       | -9.741   | 2.731 | 313.393 | .064  | -19.664 | .181   |
|                | ASNB_part pos  | -2.774   | 3.072 | 313.038 | 1.000 | -13.934 | 8.387  |
|                | ASNB_pos       | -8.764   | 4.129 | 323.923 | 1.000 | -23.762 | 6.234  |
|                | DBLPN_neg      | -5.674   | 2.717 | 317.231 | 1.000 | -15.545 | 4.198  |
|                | DBLPN_part pos | -2.336   | 2.674 | 303.983 | 1.000 | -12.053 | 7.381  |
|                | DBLPN_pos      | -.904    | 2.453 | 310.265 | 1.000 | -9.817  | 8.008  |
|                | Low6_neg       | -9.182*  | 2.465 | 310.955 | .036  | -18.140 | -.223  |
|                | Low6_part pos  | -.303    | 2.763 | 314.796 | 1.000 | -10.343 | 9.737  |
|                | Low6_pos       | .241     | 2.719 | 317.912 | 1.000 | -9.635  | 10.118 |
|                | MTPJ_neg       | -11.509* | 3.022 | 302.996 | .026  | -22.492 | -.526  |
|                | MTPJ_part pos  | 2.064    | 2.969 | 273.609 | 1.000 | -8.740  | 12.868 |
|                | MTPJ_pos       | -2.755   | 3.203 | 295.757 | 1.000 | -14.401 | 8.890  |

|               |                |         |       |         |       |         |        |
|---------------|----------------|---------|-------|---------|-------|---------|--------|
|               | other_neg      | -9.173  | 2.574 | 299.228 | .065  | -18.531 | .184   |
|               | other_part pos | .022    | 2.536 | 314.348 | 1.000 | -9.192  | 9.237  |
|               | TMTJ_neg       | -9.561* | 2.245 | 292.486 | .004  | -17.726 | -1.395 |
|               | TMTJ_part pos  | -8.727  | 2.725 | 287.163 | .232  | -18.637 | 1.184  |
|               | TMTJ_pos       | -2.630  | 2.579 | 286.355 | 1.000 | -12.009 | 6.749  |
| TMTJ_neg      | ASNB_neg       | -.181   | 2.001 | 313.602 | 1.000 | -7.449  | 7.088  |
|               | ASNB_part pos  | 6.787   | 2.467 | 322.534 | .959  | -2.173  | 15.747 |
|               | ASNB_pos       | .796    | 3.687 | 318.591 | 1.000 | -12.599 | 14.192 |
|               | DBLPN_neg      | 3.887   | 2.002 | 319.497 | 1.000 | -3.387  | 11.160 |
|               | DBLPN_part pos | 7.224*  | 1.933 | 323.946 | .034  | .205    | 14.244 |
|               | DBLPN_pos      | 8.656*  | 1.633 | 323.256 | .000  | 2.725   | 14.587 |
|               | Low6_neg       | .379    | 1.641 | 315.998 | 1.000 | -5.583  | 6.340  |
|               | Low6_part pos  | 9.257*  | 2.056 | 320.162 | .001  | 1.790   | 16.725 |
|               | Low6_pos       | 9.802*  | 2.027 | 323.634 | .000  | 2.441   | 17.163 |
|               | MTPJ_neg       | -1.948  | 2.390 | 320.278 | 1.000 | -10.629 | 6.732  |
|               | MTPJ_part pos  | 11.624* | 2.330 | 280.823 | .000  | 3.148   | 20.100 |
|               | MTPJ_pos       | 6.805   | 2.632 | 300.384 | 1.000 | -2.761  | 16.371 |
|               | other_neg      | .387    | 1.808 | 315.581 | 1.000 | -6.182  | 6.957  |
|               | other_part pos | 9.583*  | 1.774 | 321.216 | .000  | 3.140   | 16.026 |
|               | other_pos      | 9.561*  | 2.245 | 292.486 | .004  | 1.395   | 17.726 |
|               | TMTJ_part pos  | .834    | 2.009 | 305.758 | 1.000 | -6.468  | 8.136  |
|               | TMTJ_pos       | 6.930*  | 1.819 | 291.046 | .026  | .317    | 13.543 |
| TMTJ_part pos | ASNB_neg       | -1.014  | 2.538 | 320.424 | 1.000 | -10.233 | 8.204  |
|               | ASNB_part pos  | 5.953   | 2.897 | 320.750 | 1.000 | -4.569  | 16.476 |
|               | ASNB_pos       | -.037   | 4.008 | 323.952 | 1.000 | -14.594 | 14.520 |
|               | DBLPN_neg      | 3.053   | 2.542 | 315.860 | 1.000 | -6.184  | 12.290 |
|               | DBLPN_part pos | 6.391   | 2.467 | 318.072 | 1.000 | -2.570  | 15.351 |
|               | DBLPN_pos      | 7.822   | 2.231 | 322.566 | .079  | -.281   | 15.926 |
|               | Low6_neg       | -.455   | 2.251 | 320.833 | 1.000 | -8.632  | 7.722  |

|          |                |         |       |         |       |         |        |
|----------|----------------|---------|-------|---------|-------|---------|--------|
|          | Low6_part pos  | 8.423   | 2.559 | 323.966 | .169  | -.871   | 17.718 |
|          | Low6_pos       | 8.968   | 2.540 | 318.355 | .073  | -.260   | 18.196 |
|          | MTPJ_neg       | -2.782  | 2.795 | 323.525 | 1.000 | -12.935 | 7.371  |
|          | MTPJ_part pos  | 10.790* | 2.796 | 276.668 | .022  | .615    | 20.966 |
|          | MTPJ_pos       | 5.972   | 3.045 | 298.465 | 1.000 | -5.098  | 17.041 |
|          | other_neg      | -.446   | 2.375 | 304.828 | 1.000 | -9.077  | 8.184  |
|          | other_part pos | 8.749*  | 2.349 | 308.286 | .036  | .212    | 17.286 |
|          | other_pos      | 8.727   | 2.725 | 287.163 | .232  | -1.184  | 18.637 |
|          | TMTJ_neg       | -.834   | 2.009 | 305.758 | 1.000 | -8.136  | 6.468  |
|          | TMTJ_pos       | 6.097   | 2.379 | 291.160 | 1.000 | -2.553  | 14.746 |
| TMTJ_pos | ASNB_neg       | -7.111  | 2.387 | 319.224 | .476  | -15.781 | 1.559  |
|          | ASNB_part pos  | -.143   | 2.746 | 324.000 | 1.000 | -10.118 | 9.832  |
|          | ASNB_pos       | -6.134  | 3.911 | 323.815 | 1.000 | -20.338 | 8.070  |
|          | DBLPN_neg      | -3.043  | 2.374 | 322.503 | 1.000 | -11.667 | 5.580  |
|          | DBLPN_part pos | .294    | 2.315 | 315.361 | 1.000 | -8.115  | 8.703  |
|          | DBLPN_pos      | 1.726   | 2.077 | 307.979 | 1.000 | -5.824  | 9.275  |
|          | Low6_neg       | -6.552  | 2.076 | 321.152 | .267  | -14.091 | .988   |
|          | Low6_part pos  | 2.327   | 2.423 | 321.342 | 1.000 | -6.473  | 11.126 |
|          | Low6_pos       | 2.872   | 2.396 | 312.208 | 1.000 | -5.835  | 11.579 |
|          | MTPJ_neg       | -8.879  | 2.713 | 309.334 | .181  | -18.737 | .980   |
|          | MTPJ_part pos  | 4.694   | 2.654 | 274.810 | 1.000 | -4.964  | 14.352 |
|          | MTPJ_pos       | -.125   | 2.915 | 298.589 | 1.000 | -10.722 | 10.472 |
|          | other_neg      | -6.543  | 2.211 | 300.047 | .510  | -14.581 | 1.495  |
|          | other_part pos | 2.653   | 2.173 | 315.509 | 1.000 | -5.244  | 10.549 |
|          | other_pos      | 2.630   | 2.579 | 286.355 | 1.000 | -6.749  | 12.009 |
|          | TMTJ_neg       | -6.930* | 1.819 | 291.046 | .026  | -13.543 | -.317  |
|          | TMTJ_part pos  | -6.097  | 2.379 | 291.160 | 1.000 | -14.746 | 2.553  |

Based on estimated marginal means

\*. The mean difference is significant at the .05 level.

a. Dependent Variable: DPDup.

c. Adjustment for multiple comparisons: Bonferroni.
